# 1 **Distinct explanations underlie gene-environment interactions in the UK Biobank**

2 Arun Durvasula<sup>1,2,3,4,5</sup> and Alkes L. Price<sup>4,5,6</sup>

- 3 1. Center for Genetic Epidemiology, Department of Population and Public Health Sciences,
- 4 Keck School of Medicine, University of Southern California, Los Angeles, CA, USA
- 5 2. Department of Genetics, Harvard Medical School, Cambridge, MA, USA
- 6 3. Department of Human Evolutionary Biology, Harvard University, Cambridge, MA, USA
- 7 4. Program in Medical and Population Genetics, Broad Institute of MIT and Harvard,
- 8 Cambridge, MA, USA
- 9 5. Department of Epidemiology, Harvard T.H. Chan School of Public Health, Boston, MA,
- 10 USA
- 11 6. Department of Biostatistics, Harvard T.H. Chan School of Public Health, Boston, MA,
- 12 USA

13  
14 Correspondence: [arun.durvasula@med.usc.edu](mailto:arun.durvasula@med.usc.edu) or [aprice@hsph.harvard.edu](mailto:aprice@hsph.harvard.edu)

## 15 **Abstract**

16  
17  
18 The role of gene-environment (GxE) interaction in disease and complex trait architectures is  
19 widely hypothesized, but currently unknown. Here, we apply three statistical approaches to  
20 quantify and distinguish three different types of GxE interaction for a given disease/trait and E  
21 variable. First, we detect locus-specific GxE interaction by testing for genetic correlation ( $r_g$ ) < 1  
22 across E bins. Second, we detect genome-wide effects of the E variable on genetic variance by  
23 leveraging polygenic risk scores (PRS) to test for significant PRSxE in a regression of  
24 phenotypes on PRS, E, and PRSxE, together with differences in SNP-heritability across E bins.  
25 Third, we detect genome-wide proportional amplification of genetic and environmental effects as  
26 a function of the E variable by testing for significant PRSxE with no differences in SNP-  
27 heritability across E bins. Simulations show that these approaches achieve high sensitivity and  
28 specificity in distinguishing these three GxE scenarios. We applied our framework to 33 UK  
29 Biobank diseases/traits (average  $N=325K$ ) and 10 E variables spanning lifestyle, diet, and other  
30 environmental exposures. First, we identified 19 trait-E pairs with  $r_g$  significantly < 1 (FDR<5%)  
31 (average  $r_g=0.95$ ); for example, white blood cell count had  $r_g=0.95$  (s.e. 0.01) between smokers  
32 and non-smokers. Second, we identified 28 trait-E pairs with significant PRSxE and significant  
33 SNP-heritability differences across E bins; for example, type 2 diabetes had a significant PRSxE  
34 for alcohol consumption ( $P=1e-13$ ) with 4.2x larger SNP-heritability in the largest versus  
35 smallest quintiles of alcohol consumption ( $P<1e-16$ ). Third, we identified 15 trait-E pairs with  
36 significant PRSxE with no SNP-heritability differences across E bins; for example, triglyceride  
37 levels had a significant PRSxE effect for composite diet score ( $P=4e-5$ ) with no SNP-heritability  
38 differences. Analyses using biological sex as the E variable produced additional significant  
39 findings in each of the three scenarios. Overall, we infer a substantial contribution of GxE and  
40 GxSex effects to disease and complex trait variance.

## 43 Introduction

44

45 Although gene-environment (GxE) interactions have long been thought to impact the  
46 genetic architecture of diseases and complex traits<sup>1-4</sup>, the overall contribution of these effects  
47 remains unclear. Previous studies have detected GxE at a limited number of specific loci<sup>5-7</sup>  
48 (including studies that associated genotype to phenotypic variance without knowing the  
49 underlying E variable<sup>8-12</sup>). Previous studies have also proposed variance components methods  
50 for detecting genome-wide contributions of GxE to disease heritability<sup>13-18</sup>, but these methods  
51 have not been applied at biobank scale across a broad range of disease/traits. Thus, the overall  
52 contribution of GxE to disease/trait architectures is currently unknown. In addition, the relative  
53 importance of different types of GxE (e.g., locus-specific GxE, genome-wide effects of E on  
54 genetic variance, genome-wide effects of E on both genetic and environmental variance) is  
55 currently unclear. Studies of GxSex interaction face similar challenges<sup>19-24</sup>.

56

57 Here, we apply three statistical approaches to quantify and distinguish three different  
58 types of GxE interaction for a given disease/trait and E variable. First, we detect locus-specific  
59 GxE interaction by testing for genetic correlation<sup>25</sup> ( $r_g$ ) < 1 across E bins. Second, we detect  
60 genome-wide effects of the E variable on genetic variance by leveraging polygenic risk  
61 scores<sup>26,27</sup> (PRS) to test for significant PRSxE<sup>28,29</sup> in a regression of phenotypes on PRS, E, and  
62 PRSxE, together with differences in SNP-heritability<sup>30-34</sup> across E bins. Third, we detect  
63 genome-wide proportional amplification of genetic and environmental effects as a function of the  
64 E variable by testing for significant PRSxE with no differences in SNP-heritability across E bins.  
65 We analyze 33 diseases/traits from the UK Biobank<sup>35</sup> (average  $N=325K$ ), quantifying the  
66 contributions of each type of GxE effect across 10 E variables spanning lifestyle, diet, and other  
67 environmental exposures, as well as contributions of GxSex effects.

68

## 69 Results

70

### 71 *Overview of methods*

72

73 We aim to detect genome-wide GxE, i.e., GxE effects aggregated across the genome. We  
74 consider three potential scenarios that give rise to genome-wide GxE for a given disease/trait and  
75 E variable (**Figure 1a**). In the first scenario (Imperfect genetic correlation), there is an imperfect  
76 genetic correlation across E bins due to different SNP effect sizes in different E bins. In the  
77 second scenario (Varying genetic variance), there are differences in SNP-heritability across E  
78 bins due to uniform amplification of SNP effect sizes across E bins; the environmental variance  
79 may either remain constant or vary across E bins. In the third scenario (proportional  
80 amplification), the genetic and environmental variance vary proportionately across E bins due to  
81 proportionate scaling of SNP effect sizes and environmental effect sizes across E bins, so that  
82 SNP-heritability remains the same across E bins. We conceptualize these three scenarios as  
83 acting at different levels in a hierarchy that leads from genetic variants to pathways to disease  
84 (see **Discussion**).

85

86 The three scenarios can be formalized under the following model:

87

$$y_j = \sum_i x_{ij}\beta_i + \sum_i \gamma_i x_{ij}E_j + \sum_i \xi x_{ij}\beta_i E_j + \varepsilon_j + \eta \varepsilon_j E_j, \#(1)$$

88  
89 where  $y_j$  denotes the phenotype for individual  $j$ ,  $x_{ij}$  denotes the genotype of individual  $j$  at SNP  
90  $i$ ,  $\beta_i$  denotes the effect size of SNP  $i$ ,  $\gamma_i$  denotes SNP-specific GxE effects,  $E_j$  denotes the E  
91 variable value for individual  $j$ ,  $\xi$  quantifies the amplification of genetic effects across E values,  
92  $\varepsilon_j$  denotes environmental effects, and  $\eta$  quantifies the amplification of environmental effects  
93 across E values. In Scenario 1,  $\gamma_i$  will be nonzero. In Scenario 2,  $\xi$  will be nonzero. In Scenario  
94 3,  $\xi$  and  $\eta$  will be nonzero and equal.

95  
96 In this study, we apply three statistical approaches to UK Biobank data to detect genome-  
97 wide GxE, analyzing 33 diseases/traits (average  $N=325K$ ) and 10 environmental variables as  
98 well as biological sex (**Figure 1b**). First, we detect Imperfect genetic correlation (Scenario 1) by  
99 estimating the genetic correlation of effect sizes between sets of individuals binned on their E  
100 variables using cross-trait LD Score regression<sup>25</sup> (LDSC) (**Methods**). For non-binary E  
101 variables, we estimate the genetic correlation between the most extreme quintiles of the E  
102 variable; for binary E variables, we estimate the genetic correlation between individuals in each  
103 E bin. Second, we employ PRSxE regression<sup>28,29</sup>, defined as a regression of the phenotype on the  
104 PRS<sup>26,27</sup> multiplied by the E variable across individuals, to detect both Varying genetic variance  
105 (Scenario 2) and Proportional amplification (Scenario 3) (**Methods**); we note that PRSxE  
106 regression is not sensitive to changes in environmental variance only (**Methods**). We use PRS  
107 computed by PolyFun-pred<sup>27</sup> for all analyses involving PRS. We do not standardize the E  
108 variables, and we correct for main and interaction effects of several covariates (**Methods**).  
109 Finally, we distinguish between Scenario 2 and Scenario 3 by estimating the SNP-heritability  
110 within each E bin using BOLT-REML<sup>33</sup> and testing for significant differences between E bins  
111 (most extreme quintiles for non-binary E variables; each bin for binary E variables).

112  
113 We assign a trait-E pair to Scenario 1 if it has a genetic correlation across E bins  $< 1$   
114 (regardless of whether it differs in SNP-heritability or has a significant PRSxE regression term);  
115 we assign a trait-E pair to Scenario 2 if it has both a significant PRSxE regression term and a  
116 significant difference in SNP-heritability across E bins; finally, we assign a trait-E pair to  
117 Scenario 3 if it has a significant PRSxE regression term with no significant difference in SNP-  
118 heritability across E bins (**Figure 1c**). We note that for some trait-E pairs, we detected both  
119 locus-dependent GxE (Scenario 1) and non-locus-dependent GxE (Scenario 2 or Scenario 3). We  
120 estimate the excess disease/trait variance explained by genome-wide GxE as follows. In Scenario  
121 1, we transform the estimate of genetic correlation across E bins to the variance scale (**Methods**;  
122 **Supplementary Note**). In Scenario 2 and Scenario 3, we approximate the relative amount of trait  
123 variance explained by GxE effects (relative to the genetic variance) as the trait variance  
124 explained by PRSxE effects divided by the trait variance explained by the PRS; this  
125 approximation is valid under a model in which the PRSxE effects are proportional to the GxE  
126 effects (**Methods**). All reported variances are transformed to the liability scale for disease traits.  
127 We have released open-source software implementing the above approaches (see Code  
128 Availability), as well as their output from this study (see Data Availability).

129  
130 *Simulations*

131

132 We performed simulations of the three Scenarios to evaluate the properties of the three  
133 statistical approaches. We assigned individuals to one of two E bins and simulated genetic  
134 effects at 10,000 causal SNPs based on the Scenario and E bin. We simulated sample sizes  
135 specific to each statistical approach to match our real data analyses (see below). In Scenario 1,  
136 we set the SNP-heritability to 25% and varied the genetic correlation from 99% to 94%. In  
137 Scenario 2, we set the genetic correlation to 100%, set the SNP-heritability to 25% in one E bin,  
138 and varied the SNP-heritability from 26% to 30% in the other E bin. In Scenario 3, we amplified  
139 the (genetic and environmental components of) phenotypes in one E bin by a range of values  
140 from 1.025 to 1.1. In each Scenario, we report the proportion of significant tests ( $P < 0.05$ , which  
141 is fairly similar to our significance threshold for real traits; see below) for each of our three  
142 approaches: Genetic correlation ( $N=67K$  individuals per E bin), PRSxE regression (training  
143  $N=337K$ , testing  $N=49K$ ), and SNP-heritability by E ( $N=67K$  individuals per E bin). Because  
144 linkage disequilibrium (LD) does not impact GxE effects, we simulated genotypes without LD.  
145 We adjusted the methods used in our simulations accordingly. For Genetic correlation, we used  
146 cross-trait LD score regression in the special case of no LD<sup>25</sup>. For PRSxE regression, we used a  
147 simple shrinkage estimator in the special case of no LD to compute PRS. For SNP-heritability by  
148 E, we estimated SNP-heritability using LD score regression in the special case of no LD<sup>36</sup>.  
149 Further details of the simulation framework are provided in the **Methods** section.

150  
151 In Scenario 1, the Genetic correlation approach reported a significant test in 93% of  
152 simulations when the true genetic correlation was 97% or smaller, whereas the PRSxE regression  
153 and SNP-heritability by E approaches were well-calibrated (**Figure 2a** and **Supplementary**  
154 **Table 1**). In Scenario 2, the PRSxE regression approach reported a significant test in 88% of  
155 simulations when the SNP-heritability difference was 4% or larger, and the SNP-heritability by E  
156 approach reported a significant test in more than 88% of simulations when the SNP-heritability  
157 difference was 2% or larger, whereas the Genetic correlation approach was well-calibrated  
158 (**Figure 2b** and **Supplementary Table 1**). In Scenario 3, the PRSxE regression approach  
159 reported a significant test in 88% of simulations when the proportional amplification was 1.075  
160 or larger, whereas the Genetic correlation and SNP-heritability by E approaches were well-  
161 calibrated (**Figure 2c** and **Supplementary Table 1**). In null simulations (heritable trait with no  
162 GxE), all three statistical approaches were well-calibrated (**Supplementary Figure 1**).

163  
164 We compared our framework with GxEMM<sup>16</sup>, a variance components-based framework  
165 that implements two GxE tests: 1) a test for polygenic GxE under homoskedasticity (GxEMM-  
166 Hom), and 2) a test for polygenic GxE under heteroskedasticity (GxEMM-Het). We note that  
167 GxEMM-Hom and GxEMM-Het do not precisely map to the 3 scenarios that we study here. In  
168 addition, because GxEMM is a variance components-based framework, it is currently unable to  
169 scale to biobank-sized datasets. We evaluated the performance of GxEMM on a sample size of  
170 10,000 individuals, as in the simulations of ref. <sup>16</sup>. We evaluated our statistical approaches using  
171 matched sample sizes, with 5,000 individuals per binary E bin and 10,000 test individuals for  
172 PRSxE regression. We kept the training data set size the same as in our main simulations  
173 ( $N=337K$ ). In Scenario 1, the GxEMM-Hom test reported a similar proportion of significant tests  
174 as the Genetic correlation approach, whereas the GxEMM-Het test reported roughly half as many  
175 significant tests (**Supplementary Figure 2**). In Scenario 2, the GxEMM-Het test was less  
176 powerful than the PRSxE regression and SNP-heritability by E approaches, whereas the  
177 GxEMM-Hom test was well-calibrated (**Supplementary Figure 2**). In Scenario 3, the GxEMM-

178 Het test was less powerful than the PRSxE regression approach, whereas the GxEMM-Hom test  
179 was well-calibrated (**Supplementary Figure 2**). Thus, at sample sizes that permit computational  
180 tractability, GxEMM is generally less powerful than our framework (and cannot distinguish  
181 Scenario 2 and Scenario 3).

182  
183 Our framework also estimates the excess disease/trait variance explained by GxE effects,  
184 beyond what is explained by additive effects (for brevity, we refer to this as variance explained).  
185 We determined that estimates of disease/trait variance explained were accurate in each of  
186 Scenario 1 (regression slope = 0.98; **Supplementary Figure 3a**), Scenario 2 (regression slope =  
187 0.85; **Supplementary Figure 3b**), and Scenario 3 (regression slope = 1.05; **Supplementary**  
188 **Figure 3c**). We note that in both Scenario 2 and Scenario 3, G effects are correlated with GxE  
189 effects, as a correlation between genetic variance ( $G^2$ ) and the E variable implies a correlation  
190 between G and GxE. Current variance components methods do not account for this correlation  
191 and may therefore produce biased estimates of variance explained by GxE; we have verified this  
192 in simulations (**Supplementary Table 2**). Here, we report the difference in variance explained  
193 by a model including an interaction term (PRS+PRSxE terms) over a base model (PRS only) that  
194 does not include an interaction term, which is robust to this correlation (**Methods** and  
195 **Supplementary Figure 3**).

196  
197 In summary, our simulations indicate that our statistical approaches attain high sensitivity  
198 and specificity in classifying trait-E pairs into the distinct scenarios of GxE considered here and  
199 produce accurate estimates of excess trait variance explained by GxE.

200  
201 *Identifying gene-environment interactions across 33 diseases/complex traits and 10 E variables*

202  
203 We analyzed individual-level data for  $N=384K$  unrelated European-ancestry individuals  
204 from the UK Biobank<sup>35</sup>. We selected 33 highly heritable (z-score for nonzero SNP-heritability<sup>36</sup>  
205  $> 6$ ) and relatively independent (squared genetic correlation<sup>25</sup>  $< 0.5$ ) diseases and traits  
206 (**Supplementary Table 3**). In addition, we selected 10 relatively independent E variables  
207 spanning lifestyle, diet, and other environmental exposures ( $r^2 < 0.1$ ; primarily from ref. <sup>14</sup>;  
208 **Supplementary Figure 4**; see **Methods**). We note that these E variables are all significantly  
209 heritable, although the heritability tends to be low (mean SNP-heritability = 6%, max SNP-  
210 heritability = 15%; **Supplementary Table 4**). We assessed statistical significance using a  
211 threshold of  $FDR < 5\%$  across traits and E variables for a given statistical test (see **Methods**); in  
212 practice, this FDR threshold corresponded to a P-value threshold of  $\approx 0.01$ , which is fairly  
213 similar to our simulations.

214  
215 Trait-E pairs assigned to Scenario 1 (Imperfect genetic correlation) are reported in **Figure**  
216 **3a** and **Supplementary Table 5**. We identified 19 trait-E pairs with genetic correlation  
217 significantly less than 1 ( $FDR < 5\%$ ; average genetic correlation: 0.95), implicating 12 of 33 traits  
218 and 9 of 10 E variables tested. The implicated traits included 9 blood cell and biochemistry traits,  
219 as well as height, BMI, and asthma. On average, these interactions explained 0.27% of  
220 disease/trait variance across all traits analyzed. The lowest significant genetic correlation was  
221 0.85 (se=0.06) for asthma x time spent watching television, explaining 1.5% of trait variance.  
222 The significant GxE interaction for BMI and smoking status (explaining 0.4% of trait variance)  
223 was consistent with results from ref. <sup>14</sup>. Trait-E pairs assigned to Scenario 2 (Varying genetic

224 variance) are reported in **Figure 3b** and **Supplementary Table 5**. We identified 28 trait-E pairs  
225 with significant PRSxE interaction (FDR<5%) and a significant SNP-heritability by E test  
226 (FDR<5%), implicating 13 of 33 traits and 9 of 10 E variables tested. On average, these  
227 interactions explained 2.6% of disease/trait variance across all traits analyzed; the variance  
228 explained by GxE effects was larger for binary traits than for quantitative traits (see **Discussion**).  
229 Because standard interaction tests can be anti-conservative due to unmodeled  
230 heteroskedasticity<sup>37</sup>, we repeated our PRSxE interaction analysis using Huber-White variance  
231 estimators<sup>38,39</sup> (**Methods**). We determined that results were highly concordant with our primary  
232 PRSxE interaction analysis (mean Pearson correlation in p-values for interaction across trait-E  
233 pairs: 97%; **Supplementary Table 6**), suggesting that our findings are not driven by unmodeled  
234 heteroskedasticity. Trait-E pairs assigned to Scenario 3 (Proportional amplification) are reported  
235 in **Figure 3c** and **Supplementary Table 5**. We identified 15 trait-E pairs with significant PRSxE  
236 interaction (FDR<5%) but a non-significant SNP-heritability by E test (FDR<5%), implicating  
237 11 of 33 traits and 9 of 10 E variables tested. On average, these interactions explained 0.13% of  
238 disease/trait variance across all traits analyzed.

239  
240 We checked whether any trait-E pairs were assigned to more than one Scenario. We  
241 determined that 2 trait-E pairs were assigned to both Scenario 1 and Scenario 2 (BMI x alcohol  
242 consumption and BMI x Townsend deprivation index); 0 trait-E pairs were assigned to both  
243 Scenario 1 and Scenario 3; and 0 trait-E pairs were assigned to both Scenario 2 and Scenario 3  
244 (which is not possible based on their definition). We also identified 108 trait-E pairs with a  
245 significant SNP-heritability by E test but non-significant PRSxE interaction (**Supplementary**  
246 **Table 7**); our primary interpretation is that this is due to changes in environmental variance  
247 rather than GxE interaction (**Methods**), but we cannot exclude the possibility that this is due to  
248 GxE interaction that we have incomplete power to detect.

249  
250 Examples of trait-E pairs assigned to each scenario are reported in **Figure 4** and  
251 **Supplementary Table 8**. First, white blood cell count x smoking status was assigned to Scenario  
252 1 (**Figure 4a**). The Genetic correlation approach estimated a genetic correlation between  
253 smokers and non-smokers of 0.95, which is significantly less than 1 (P=6.7e-7; FDR < 5%),  
254 explaining 0.5% of the variance of white blood cell count (vs. SNP-heritability of 30%). On the  
255 other hand, the PRSxE regression approach (P=0.46) and SNP-heritability x E approach (P=0.39)  
256 produced non-significant results. We note that smokers had 0.09 s.d. higher mean white blood  
257 cell count than non-smokers (T-test P<1e-16), as previously reported<sup>40</sup>. Second, type 2 diabetes x  
258 alcohol consumption was assigned to Scenario 2 (**Figure 4b**). The PRSxE regression approach  
259 (P=1e-13) and SNP-heritability x E approach (SNP-heritability (liability scale) of 0.45 for  
260 highest E quintile vs. 0.38 for lowest E quintile; P<1e-16) both produced significant results  
261 (FDR < 5%), explaining 18% of the variance of type 2 diabetes (vs. SNP-heritability of 35%).  
262 On the other hand, the genetic correlation approach produced a non-significant result (P=0.15).  
263 We note that the prevalence of type 2 diabetes varied with alcohol consumption (6% in highest E  
264 quintile vs. 3% in lowest E quintile; P<2e-16), as previously reported<sup>41</sup>. Third, WHRadjBMI x  
265 time spent watching television (TV time) was assigned to Scenario 3 (**Figure 4c**). The PRSxE  
266 regression approach produced a significant result (P=5e-3; FDR < 5%), explaining 0.95% of the  
267 variance of WHRadjBMI. On the other hand, the genetic correlation approach (P=0.29) and  
268 SNP-heritability x E approach (P=0.08) produced non-significant results. We note that  
269 WHRadjBMI and TV time were correlated ( $r = 0.08$ , P<1e-16).

270

271 In summary, we detected GxE interaction in each of the three scenarios across the 33  
272 diseases/traits and 10 E variables analyzed. We estimate that these GxE effects explain 3.0% of  
273 disease/trait variance across all traits analyzed (s.e. 1.5% across traits), compared to SNP-  
274 heritability of 29% (s.e. 3% across traits).

275

276 *Identifying gene-sex interactions across 33 diseases/complex traits*

277

278 We analyzed the same 33 diseases/traits for GxSex interaction using the same 3 statistical  
279 approaches. Traits assigned to Scenario 1 (Imperfect genetic correlation) are reported in **Figure**  
280 **5a** and **Supplementary Table 9**. We identified 22 traits with cross-sex genetic correlation  
281 significantly less than 1 (FDR<5%; average genetic correlation: 0.92), consistent with previous  
282 results<sup>22</sup>. On average, these interactions explained 2.6% of trait variance across all traits  
283 analyzed. The lowest significant genetic correlation was 0.66 for WHRadjBMI<sup>22</sup>, explaining  
284 17% of trait variance. Traits assigned to Scenario 2 (Varying genetic variance) are reported in  
285 **Figure 5b** and **Supplementary Table 9**. We identified 12 traits with significant PRSxSex  
286 interaction (FDR<5%) and a significant SNP-heritability by Sex test (FDR<5%). On average,  
287 these interactions explained 1.4% of trait variance across all traits; the variance explained by  
288 GxSex effects was larger for binary traits than for quantitative traits (see **Discussion**). The  
289 largest PRSxSex interaction was for type 2 diabetes, explaining 0.39% of trait variance. Traits  
290 assigned to Scenario 3 (Proportional amplification) are reported in **Figure 5c** and  
291 **Supplementary Table 9**. We identified 8 traits with significant PRSxSex interaction (FDR<5%)  
292 but a non-significant SNP-heritability by Sex test (FDR<5%). On average, these interactions  
293 explained 0.05% of trait variance across all traits analyzed (a very small contribution). Of the 30  
294 traits implicated across three scenarios, we identified 7 traits assigned to both Scenario 1 and  
295 Scenario 2, and 5 traits assigned to both Scenario 1 and Scenario 3 (**Supplementary Table 9**).  
296 We also identified 2 traits with a significant SNP-heritability x Sex test but non-significant  
297 PRSxSex interaction (**Supplementary Table 10**); our primary interpretation is that this is due to  
298 changes in environmental variance rather than GxSex interaction (**Methods**).

299

300 Examples of traits with significant GxSex assigned to each Scenario are reported in  
301 **Figure 6** and **Supplementary Table 11**. First, neuroticism was assigned to Scenario 1 (**Figure**  
302 **6a**). The Genetic correlation approach estimated a cross-sex genetic correlation of 0.90, which is  
303 significantly less than 1 (P=3.5e-9; FDR < 5%), explaining 5.0% of the variance of neuroticism.  
304 On the other hand, the PRSxSex regression approach (P=0.58) and SNP-heritability by Sex  
305 approach (P=0.45) produced non-significant results. We note that males had lower prevalence of  
306 neuroticism than females (1.6% vs. 2.3% in top score for neuroticism, P<1e-16), as previously  
307 reported<sup>42</sup>. Second, All autoimmune disease was assigned to Scenario 2 (**Figure 6b**). The  
308 PRSxSex regression approach (P=2e-15) and SNP-heritability by Sex approach (SNP-heritability  
309 (liability scale) of 23% for males and 18% for females; P<1e-16) both produced significant  
310 results (FDR < 5%), explaining 4.9% of the variance of All autoimmune disease (vs. SNP-  
311 heritability of 19%). On the other hand, the genetic correlation approach produced a non-  
312 significant result (P=0.03). We note that males had lower prevalence of All autoimmune disease  
313 than females (7.2% vs. 16%, P<1e-16), as previously reported<sup>43</sup>. Third, HDL cholesterol was  
314 assigned to Scenario 3 (**Figure 6c**). The PRSxSex regression approach produced a significant  
315 result (P<2e-16; FDR < 5%), explaining 0.4% of the variance of HDL cholesterol. On the other

316 hand, the SNP-heritability by Sex approach ( $P=0.09$ ) was not significant. However, the genetic  
317 correlation approach estimated a cross-sex genetic correlation of 0.93, which is significantly less  
318 than 1 ( $P=5e-6$ ;  $FDR < 5\%$ ), explaining 3.5% of the variance of HDL cholesterol (Scenario 1);  
319 this implies that multiple types of GxSex interaction impact HDL cholesterol. We note that  
320 males had 0.83 s.d. lower HDL cholesterol than females ( $P<1e-16$ ).

321

322 In summary, we detected GxSex interaction in each of the three scenarios across the 33  
323 diseases/traits analyzed. We estimate that these GxSex effects explain 4.0% of disease/trait  
324 variance across all traits analyzed (s.e. 1.1% across traits), compared to SNP-heritability of 29%  
325 (s.e. 3%).

326

## 327 Discussion

328

329 We have applied three statistical approaches to detect, quantify, and distinguish the genome-  
330 wide contributions of three different types of GxE interaction (**Figure 1a**) across 33 UK Biobank  
331 diseases/traits, analyzing 10 E variables spanning lifestyle, diet, and other environmental  
332 exposures as well as biological sex. We determined that GxE interactions (involving these E  
333 variables) and GxSex interactions each explained a significant fraction of phenotypic variance,  
334 representing an appreciable contribution to disease/trait architectures. It is possible that GxE  
335 interactions involving E variables not studied here could explain even more phenotypic variance.

336

337 Our finding of distinct explanations underlying GxE interactions (**Figure 1a**) motivates a  
338 unified model consistent with this finding. We propose a model in which GxE occurs at different  
339 levels of a hierarchy that leads from genetic variants to pathways to disease (**Supplementary**  
340 **Figure 5**). In this model, Scenario 1 (Imperfect genetic correlation) occurs when an E variable  
341 modifies the effects of individual variants (or sets of variants), differentially impacting different  
342 parts of the genome; Scenario 2 (Varying genetic variance) occurs when an E variable modifies  
343 all of the pathways underlying genetic risk, uniformly impacting genetic variance; and Scenario  
344 3 (Proportional amplification) occurs when an E variable modifies all aspects of disease biology,  
345 proportionately impacting both genetic and environmental variance. Under this model, an E  
346 variable can modify any point along the hierarchy from genetic variants to pathways to disease.  
347 Further investigation and validation of this model is a direction for future research.

348

349 Our study represents an advance over previous studies investigating genome-wide GxE.  
350 First, we distinguish three different types of GxE interaction: Imperfect genetic correlation,  
351 Varying genetic variance, and Proportional amplification (**Figure 1a**; also see **Supplementary**  
352 **Figure 5**). Second, most variance components methods for detecting genome-wide GxE<sup>13–15,17,18</sup>  
353 cannot detect genome-wide GxE unless SNP-heritability varies across E bins (Scenario 2). An  
354 exception is GxEMM<sup>16</sup>, which detects other types of GxE by explicitly modeling genetic and  
355 environmental variance that varies with the E variable; however, GxEMM is less  
356 computationally tractable and generally less powerful than our framework (**Supplementary**  
357 **Figure 2**). Third, variance components methods that assume independence between G and GxE  
358 effects are susceptible to bias if G and GxE effects are correlated, but our statistical approaches  
359 are robust to this possibility (**Supplementary Figure 3**). Fourth, previous methods have not been  
360 applied at biobank scale across a broad range of disease/traits; the statistical approaches that we  
361 propose are computationally scalable to very large data sets (see **Methods**), enabling our



362 biobank-scale analyses implicating 60 trait-E pairs with significant GxE and 30 traits with  
363 significant GxSex. Fifth, a recent study reported that GxSex acts primarily through  
364 amplification<sup>24</sup> (Scenario 2 and Scenario 3), but our analyses of GxSex determined that  
365 Imperfect genetic correlation (Scenario 1) explained a larger proportion of trait variance than  
366 amplification; in addition, ref. <sup>24</sup> did not estimate contributions to trait variance and did not  
367 distinguish between Scenario 2 and Scenario 3, as we do here.

368  
369 Our study has several implications. First, our results narrow the search space of disease/traits  
370 and E variables for which genome-wide association studies of GxE interactions are most likely to  
371 be fruitful; in particular, trait-E pairs with substantial trait variance explained by Scenario 1  
372 (Imperfect genetic correlation) (**Supplementary Table 5**) should be prioritized for locus-specific  
373 analyses, in preference to trait-E pairs with trait variance explained by Scenario 2 or Scenario 3.  
374 Second, our results imply that there is broad potential to improve polygenic risk scores (PRS) by  
375 leveraging information on E variables in training and/or test samples<sup>44</sup>. Third, there is broad  
376 potential to prioritize individuals for which a lifestyle intervention to modify an E variable would  
377 be most effective based on their genetic profile. Fourth, previous work has suggested that  
378 population-specific causal effect sizes in functionally important regions may be caused by  
379 GxE<sup>45</sup>, motivating efforts to partition the imperfect genetic correlations across E bins that we  
380 have identified across functionally important regions. Fifth, the significant contribution of GxE  
381 to disease/trait architectures—even when restricting to the limited set of E variables that we  
382 analyzed here—implicates GxE effects as a factor in “missing heritability”, defined as the gap  
383 between estimates of SNP-heritability<sup>30</sup> and estimates of narrow-sense heritability<sup>46</sup> (e.g. from  
384 twin studies<sup>47</sup>); although GxE effects are not included in the *definition* of narrow-sense  
385 heritability, they can inflate twin-based *estimates* of narrow-sense heritability, analogous to GxG  
386 effects<sup>48</sup>. All of these implications motivate directions for future research.

387  
388 Our study has several limitations. First, our analyses assess GxE and GxSex interaction for  
389 binary traits on the observed scale (and then transform estimates to the liability scale), consistent  
390 with prevailing approaches for variance component analysis of binary traits<sup>31–34</sup>. This approach  
391 leads to much larger variance explained by GxE and GxSex for binary traits vs. quantitative traits  
392 in Scenario 2 (**Supplementary Table 12**; also see **Figure 3b** and **Figure 5b**). These statistical  
393 interactions may not be indicative of biological interactions, as previously noted in the context of  
394 both GxE interaction<sup>2</sup> and GxG interaction<sup>49</sup>. Directly modeling GxE interaction on the liability  
395 scale<sup>50,51</sup> is an important direction for future research, and may produce different findings.  
396 Second, the E variables that we analyzed comprise an extremely limited subset of the set of E  
397 variables that may contribute to GxE effects (and their values may be subject to measurement  
398 error); even when GxE effects are detected, the implicated E variable may be tagging an  
399 unmeasured causal E variable with larger GxE effects. Third, our use of PRSxE regression to  
400 detect GxE is limited by the accuracy of PRS and may require larger training sample sizes  
401 (enabling more accurate PRS) to be well-powered, particularly for less heritable diseases/traits.  
402 The average accuracy of the PRS across traits in the held-out set of 49K individuals was 9.2%, as  
403 measured by  $r^2$  between predicted and true phenotypes (**Supplementary Table 3**). Fourth, our  
404 estimates of the trait variance explained by GxE effects detected via PRSxE analyses assume that  
405 PRSxE effects extrapolate linearly to GxE effects (**Methods**); we believe that this is a reasonable  
406 assumption, but we cannot formally exclude the possibility that genetic effects captured by PRS  
407 interact differently with an E variable than genetic effects not captured by PRS. Fifth, most of the

408 E variables that we study are weakly heritable (**Supplementary Table 4**), raising the possibility  
409 of GxG (rather than GxE) effects; we consider GxG to be an unlikely explanation given the E  
410 variables' low SNP-heritabilities, but we cannot formally exclude this possibility. Sixth, our use  
411 of PRSxE regression to detect GxE may be anti-conservative due to unmodeled  
412 heteroskedasticity<sup>37</sup>; however, we obtained nearly identical results using Huber-White variance  
413 estimators (also known as robust regression<sup>38,39</sup>) (**Supplementary Table 6**), suggesting that this  
414 does not impact our findings. We note that we observe many instances of differences in trait  
415 variance across E variables (**Supplementary Table 7**), but these alone are not indicative of GxE  
416 interactions. Seventh, our use of PRSxE regression to detect GxE may produce false positives if  
417 there is a nonlinear relationship between E and trait value; we included an  $E^2$  term in PRSxE  
418 regressions to ameliorate this possibility but determined that inclusion or exclusion of the  $E^2$   
419 term had little impact on our results (**Supplementary Table 13**), suggesting that nonlinear  
420 effects do not greatly impact our findings. Eighth, we have analyzed British-ancestry samples  
421 from the UK Biobank, but an important future direction is to extend our analyses to cohorts of  
422 diverse genetic ancestry<sup>52,53</sup>, which may differ in their distributions of E variables, tagging of  
423 causal E variables by measured E variables, and/or causal GxE effects (analogous to differences  
424 in main G effects<sup>45,54</sup>). Eighth, we do not analyze GxAge interaction (and we note the limited age  
425 variation in UK Biobank samples; age =  $55 \pm 8$  years), but we highlight GxAge interaction and  
426 longitudinal data as important directions for future research<sup>51,55,56</sup>. Despite these limitations, our  
427 work quantifies and distinguishes three different types of GxE interaction across a broad set of  
428 diseases/traits and E variables.

429

### 430 **Code Availability**

431

432 Cross trait LDSC: <https://github.com/bulik/ldsc>

433 BOLT-LMM: <https://alkesgroup.broadinstitute.org/BOLT-LMM/downloads/>

434 PRSxE regression: Will be added upon publication.

435 Code to reproduce analysis: Will be added upon publication.

436

### 437 **Data Availability**

438

439 We will make the results of the three statistical approaches we use here publicly available upon  
440 publication.

441

### 442 **Acknowledgements**

443

444 We are grateful to Martin Zhang, Ben Strober, Xilin Jiang, and Jordan Rossen for helpful  
445 discussions and Sriram Sankararaman and Ali Pazokitoroudi for comments on an earlier version  
446 of this manuscript. This research was conducted using the UK Biobank resource under  
447 application no. 16549 and funded by National Institutes of Health (NIH) grants R01 MH101244,  
448 R37 MH107649 and R01 HG006399. The funders had no role in study design, data collection  
449 and analysis, decision to publish or preparation of the manuscript.

450

### 451 **Methods**

452

453 *Data sources and preprocessing*

454  
455 We used data from the UK Biobank in all our analyses. For polygenic score-based analyses that  
456 required a training and testing dataset, we used a set of 337K unrelated white British individuals  
457 for training<sup>27</sup>. For testing, we used a set of 49K European individuals who are unrelated to each  
458 other and to the training cohort<sup>27</sup>. Note that while “testing” typically refers to a setting where the  
459 ultimate goal is to assess PRS accuracy, here we use it to refer to the set of samples we in which  
460 we run a regression of phenotype on PRSxE and covariates. We used polygenic scores generated  
461 by ref.<sup>27</sup>. We used the linear scoring function in Plink v1.9<sup>57</sup> to compute polygenic scores in the  
462 set of 49K test individuals.

463  
464 *Choice of diseases/traits and environmental variables*

465  
466 We chose a set of 33 diseases/traits with SNP heritability Z scores > 6 and squared genetic  
467 correlation less than 0.5 (**Supplementary Table 3, Supplementary Table 4**). We chose a set of  
468 10 E variables, including 5 previously analyzed E variables from ref.<sup>14</sup> and 5 additional E  
469 variables (Air pollution, time spent napping, sleeplessness, Diet, wheat consumption)  
470 (**Supplementary Figure 4**).

471  
472 To compute the Diet variable, we performed PCA on a covariance matrix consisting of several  
473 diet variables: cooked vegetable intake, salad intake, fresh fruit intake, processed meat intake,  
474 poultry intake, beef intake, pork intake, coffee intake (**Supplementary Figure 6**). We used the  
475 function `prcomp` in R and extracted the first PC.

476  
477 *Genetic correlation approach to detecting GxE*

478  
479 We performed GWAS using BOLT-LMM<sup>26</sup> within bins of E variables. Then, we used bivariate  
480 LD Score regression<sup>36</sup> to estimate the genetic correlation between the top and bottom quintiles of  
481 E variables; for binary E variables, we estimated the genetic correlation between individuals in  
482 each E bin. We used imputed SNPs with MAF > 0.01% and used the `--no-intercept` option to  
483 increase our power. Computed a Z score testing against the null hypothesis that the genetic  
484 correlation is 1 as:

485

$$Z = \frac{1 - \hat{r}_g}{\widehat{se}}$$

486  
487 *PRSxE regression approach to detecting GxE*

488  
489 Our PRSxE regression takes the following form:

490

$$Y = PRS + E + PRS * E + C\#$$

491  
492 where Y is the trait value, PRS is the polygenic score for the trait (see *Data sources and*  
493 *preprocessing*), E is the environment variable, and C is a set of covariates. For all analyses, we  
494 correct for the following covariates: age, sex, 10 genetic PCs computed in the held-out set, the  
495 squared E variable: E<sup>2</sup>, age\*sex, E\*age, E\*sex. We carried out this regression using the Python  
496 package `statsmodels` v0.14. We also compute a ‘base’ model, which is the same regression

497 without the PRSxE term. We use the p-value associated with the PRSxE term in the interaction  
498 model to assess significance.

499  
500 To test whether our results were driven by heteroskedasticity, we performed the same analysis  
501 using robust standard errors as implemented in statsmodels using the ‘H1’ covariance matrix  
502 (Supplementary Table 12).

503  
504 We note the PRSxE regression test is not expected to produce a significant finding if the  
505 environmental variance changes as a function of E but the genetic variance does not change as a  
506 function of E, because the PRS does not measure changes in environmental variance.

507  
508 *SNP-heritability by E approach to detecting GxE*

509  
510 We used BOLT-REML<sup>33</sup> v2.3.6 to compute heritability in bins of E variables.

511 To test for a significant difference in heritability between two bins, we computed a Z score as:

512

$$Z = \frac{h_1^2 - h_2^2}{\sqrt{\sigma_1^2 + \sigma_2^2}}$$

513 where 1 and 2 index the E bins.

514

515 *False Discovery Rate (FDR) control*

516

517 We chose a 5% FDR control separately for each statistical approach (Genetic correlation, PRSxE  
518 regression, and SNP-heritability by E) using the qvalue R package<sup>58</sup>. We ensured our one-sided  
519 test against a null genetic correlation of 1 did not produce a skewed P-value distribution, which  
520 could indicate improper choice of a one-sided test. We chose to control the FDR separately for  
521 GxE and GxSex analyses because we expected the proportional of truly null tests to be different  
522 between GxE and GxSex. In particular, we expected to find more truly positive GxSex tests  
523 given previous studies<sup>22,24</sup>. Consistent with this, we found the qvalue procedure for estimating  
524 the proportion of truly null hypotheses failed in the GxSex analyses and we had to set the  
525 proportion of true null tests ( $\pi_0$ ) to 1, which is equivalent to the Benjamini-Hochberg  
526 procedure<sup>59</sup>. Story and Tibshirani<sup>60</sup> argue this is much more conservative than the qvalue  
527 procedure. Our choice to control each E variable together is conservative, but accounts for non-  
528 zero correlations between E variables.

529

530 *Classification of trait-E pairs into Scenarios*

531

532 We combined the results of the three statistical approaches to classify trait-E pairs into 3 distinct  
533 scenarios. We classified trait-E pairs into Scenario 1 if the Genetic correlation was significantly  
534 less than 1. We classified trait-E pairs into Scenario 2 if the SNP-heritability by E and PRSxE  
535 regression approaches were significant. We classified trait-E pairs into Scenario 3 if the PRSxE  
536 regression approach was significant but the SNP-heritability by E approach was not significant.  
537 It is possible that the SNP-heritability by E approach is significant but the PRSxE regression  
538 approach is not significant, which should not be viewed as an instance of GxE because the SNP-  
539 heritability difference may be driven by changes to the environmental variance rather than the  
540 genetic variance. In addition, it is possible for trait-E pairs to be classified into both Scenario 1

541 and Scenario 2, or both Scenario 1 and Scenario 3, but not both Scenario 2 and Scenario 3  
542 because significance or non-significance of the SNP-heritability by E approach are mutually  
543 exclusive.

544

#### 545 *Scalability of statistical approaches*

546

547 We consider the scalability of the three statistical approaches we use here. First, there is the  
548 computational cost of producing the input to our statistical approaches. For the genetic  
549 correlation test, this consists of running GWAS in bins of E variables. There are many scalable  
550 approaches for this, including BOLT-LMM<sup>26</sup>, regenie<sup>61</sup>, and fastGWA<sup>62</sup>. For PRSxE regression,  
551 this consists of computing PRS weights. There are many scalable approaches for this including  
552 BOLT-LMM<sup>26</sup>, PRScs<sup>63</sup>, SBayesR<sup>64</sup>, and LDpred2<sup>65</sup>. SNP-heritability by E does not require  
553 generating additional input. In these analyses, we use BOLT-LMM for GWAS, which has a  
554 runtime that scales with O(MN), where M is the number of SNPs and N is the sample size of  
555 individuals. For PRSxE regression we use weights computed by Weissbrod et al 2022<sup>27</sup>, who did  
556 not publish an analysis of runtime. Second, there is the computational cost of the statistical  
557 approaches themselves. For genetic correlation, we use cross-trait LDSC<sup>25</sup>, which runs in  
558 seconds (< 30s for the SNP sets that we analyze here). For PRSxE regression, we use a multiple  
559 regression, which also runs in seconds (< 30s for the sample size that we analyze here). For SNP-  
560 heritability by E, we use BOLT-REML<sup>33</sup>, which has a runtime that scales with O(MN).

561

#### 562 *Simulations*

563

564 To test the power of each approach, we simulated 1,000 replicates of each scenario. In all cases,  
565 we simulated two E bins and varied the parameters according to the respective generative  
566 models. For each replicate, we simulated  $M=10,000$  causal SNPs with effect sizes drawn from a  
567 specified distribution. We generated unlinked genotypes with binomial sampling from an allele  
568 frequency of 0.5.

569

570 We simulated causal effect sizes for each scenario as follows:

571

572 Scenario 1

$$\begin{bmatrix} \beta_1 \\ \beta_2 \end{bmatrix} \sim N \left( \begin{bmatrix} 0 \\ 0 \end{bmatrix}, \begin{bmatrix} \sigma_g^2/M & \gamma/M \\ \gamma/M & \sigma_g^2/M \end{bmatrix} \right)$$

573

574 We simulated  $\sigma_g^2 = 0.25$  and varied  $\gamma$  to produce genetic correlations  
575  $r_g \in \{1, 0.99, 0.98, 0.97, 0.96, 0.95, 0.94\}$ .

576

577 Scenario 2

$$\begin{bmatrix} \beta_1 \\ \beta_2 \end{bmatrix} \sim N \left( \begin{bmatrix} 0 \\ 0 \end{bmatrix}, \begin{bmatrix} \sigma_{g,1}^2/M & \sigma_{g1}\sigma_{g2}/M \\ \sigma_{g1}\sigma_{g2}/M & \sigma_{g,2}^2/M \end{bmatrix} \right)$$

578

579

580 We simulated  $\sigma_{g1}^2=0.25$  and set  $\sigma_{g2}^2$  to produce a difference in heritability:

581  $\{0, 0.01, 0.02, 0.03, 0.04, 0.05\}$ . Our choice of covariance ensures the genetic correlation is one.

582  
583 Scenario 3  
584

$$\begin{bmatrix} \beta_1 \\ \beta_2 \end{bmatrix} \sim N \left( \begin{bmatrix} 0 \\ 0 \end{bmatrix}, \begin{bmatrix} \sigma_g^2/M & \sigma_g^2/M \\ \sigma_g^2/M & \sigma_g^2/M \end{bmatrix} \right)$$

585  
586 We set  $\sigma_g^2 = 0.25$ . To simulate proportional amplification, we multiplied the phenotypes for  
587 individuals in environment 2 by a constant:  $\{1.0, 1.025, 1.05, 1.075, 1.1\}$ .

588  
589 Using the simulated causal effect sizes, we simulated GWAS effect size estimates as:

$$\hat{\beta}_1 \sim N \left( \beta_1, \frac{(1 - h_1^2)/M}{N} \right)$$

590  
591 
$$\hat{\beta}_2 \sim N \left( \beta_2, \frac{(1 - h_2^2)/M}{N} \right)$$

592  
593 where 1 and 2 index the environments and  $N$  denotes GWAS sample size. We estimate  $h_g^2$  from  
594 the simulated causal effect sizes by first computing the  $\chi^2$  statistic ( $\chi^2 := N * \hat{\beta}^2$ ), then  
595 computing  $h_g^2 = \frac{M}{N} E[\chi^2 - 1]$ , where  $E$  denotes the mean computed over the independent  
596 SNPs<sup>25</sup>.

597 We compute the genetic correlation as:

$$r_g = \frac{\hat{\beta}_1^T \hat{\beta}_2}{\sqrt{\hat{h}_{g,1}^2 * \hat{h}_{g,2}^2}}$$

598  
599 where  $T$  denotes the transpose. We compute standard errors for the estimates using a jackknife  
600 over SNPs, where we leave out one SNP at a time because they are independent.

601  
602 To simulate PRSxE, we first simulated causal effect sizes for 10,000 independent SNPs. Then,  
603 we compute PRS weights analytically as:

604 
$$\beta_{PRS} = \left( \frac{h_g^2}{h_g^2 + \frac{M}{N}} \right) \hat{\beta}.$$

605  
606 This simple shrinkage estimator can be interpreted as the posterior mean causal effect size under  
607 a normal prior (in the special case of no LD), and is similar to the posterior mean causal effect  
608 size under a point-normal prior (in the special case of no LD) when the genetic architecture is  
609 highly polygenic<sup>66</sup>, as simulated here.

610  
611 We estimate  $h_g^2$  without knowledge of the E bins, mimicking estimation of SNP-heritability  
612 across the 337K individuals; we estimate  $h_g^2$  as the sum of squared standardized effect sizes  
613 (averaged across E bins).

614

615 We also evaluated the performance of GxEMM in detecting GxE in Scenarios 1, 2, and 3. We  
616 followed the simulation framework in the original publication and simulated 1,000 causal SNPs  
617 and 10,000 individuals. We simulated a binary E variable and drew SNP effects according to  
618 each Scenario. We performed two tests within the GxEMM framework: 1) IID versus Hom,  
619 which tests for polygenic GxE under homoscedasticity, and 2) Free versus Hom, which test for  
620 polygenic GxE allowing for heteroskedasticity. We performed a Wald test as implemented in  
621 GxEMM and compared the point estimates of heritability in the free model to the simulated  
622 heritability in each of the environments. We performed 100 simulation replicates.

623  
624 To compare GxEMM with our tests, we simulated data under the same framework with matched  
625 sample sizes. Specifically, for genetic correlation and SNP-heritability x E, we simulated 5,000  
626 individual per E bin (total N=10,000). For PRSxE, we used a training set sample size of 337K,  
627 which matches the real data, and a held out set of N=10,000.

628

### 629 *Estimation of trait variance explained*

630

631 For trait-E pairs in Scenario 1, we compute the trait variance explained by GxE as  $(1 - r_g)/2$  for  
632 binary E variables (where  $r_g$  is the genetic correlation between the two E bins) (**Supplementary**  
633 **Note**) and  $\frac{1-r_g}{10}$  for continuous E variables (where  $r_g$  is the genetic correlation between the top  
634 and bottom quintiles of E values). To obtain the transformation for continuous E variables, we  
635 used our simulations (see above) to examine the relationship between estimated genetic  
636 correlation and the variance explained by GxE. We found when we binned the E variable into 5  
637 bins and computed the genetic correlation between the top and bottom bins, the transformation  
638  $\frac{1-r_g}{10}$  produced accurate estimates of the variance explained by GxE. For trait-E pairs in Scenarios  
639 2 or 3, we divide the variance explained by the PRSxE regression term by the variance explained  
640 by the PRS and multiply by the SNP-heritability. We verified these scaling procedures produce  
641 accurate estimates of the excess variance explained by GxE in simulations (**Supplementary**  
642 **Figure S3**). For Scenario 1, we simulated a continuous E variable with mean 0 and variance 1  
643 for 337K individuals. We simulated main genetic effects drawn from a normal distribution with  
644 mean 0 and variance 0.25 and environment interaction effects from a normal distribution with  
645 mean 0 and variance across a range of parameters (1e-1 to 1e-5) for 5,000 SNPs. We binned  
646 individuals into 5 bins and ran a GWAS in the top and bottom bins and compute the genetic  
647 correlation between the bins. Then, we scaled the estimates according to the formula above  
648 (**Supplementary Figure S3a**). For Scenarios 2 and 3, we simulated 1,000 causal SNPs from a  
649 normal distribution with mean 0 and variance 0.25. We simulated a continuous E variable with  
650 mean 0 and variance 1 for 49K individuals. We set the amplification parameter to 0.1 and  
651 generated phenotypes according to Eq. 1 (*Overview of methods*). We performed GWAS and  
652 estimated PRS weights as in the *Simulations* section. Then, we ran the PRSxE test and computed  
653 the variance explained. We then compared this to the true variance explained (**Supplementary**  
654 **Figure S3b, S3c**). This scaling assumes that PRSxE effects linearly extrapolate to GxE effects.  
655 We do not use the estimates of differences in SNP-heritability by E to estimate the variance  
656 explained by GxE. When reporting average variance explained per trait, we computed the  $R^2$  for  
657 each trait using a model including all marginally significant (FDR < 5%) interaction terms for  
658 that trait (**Supplementary Table 14**).

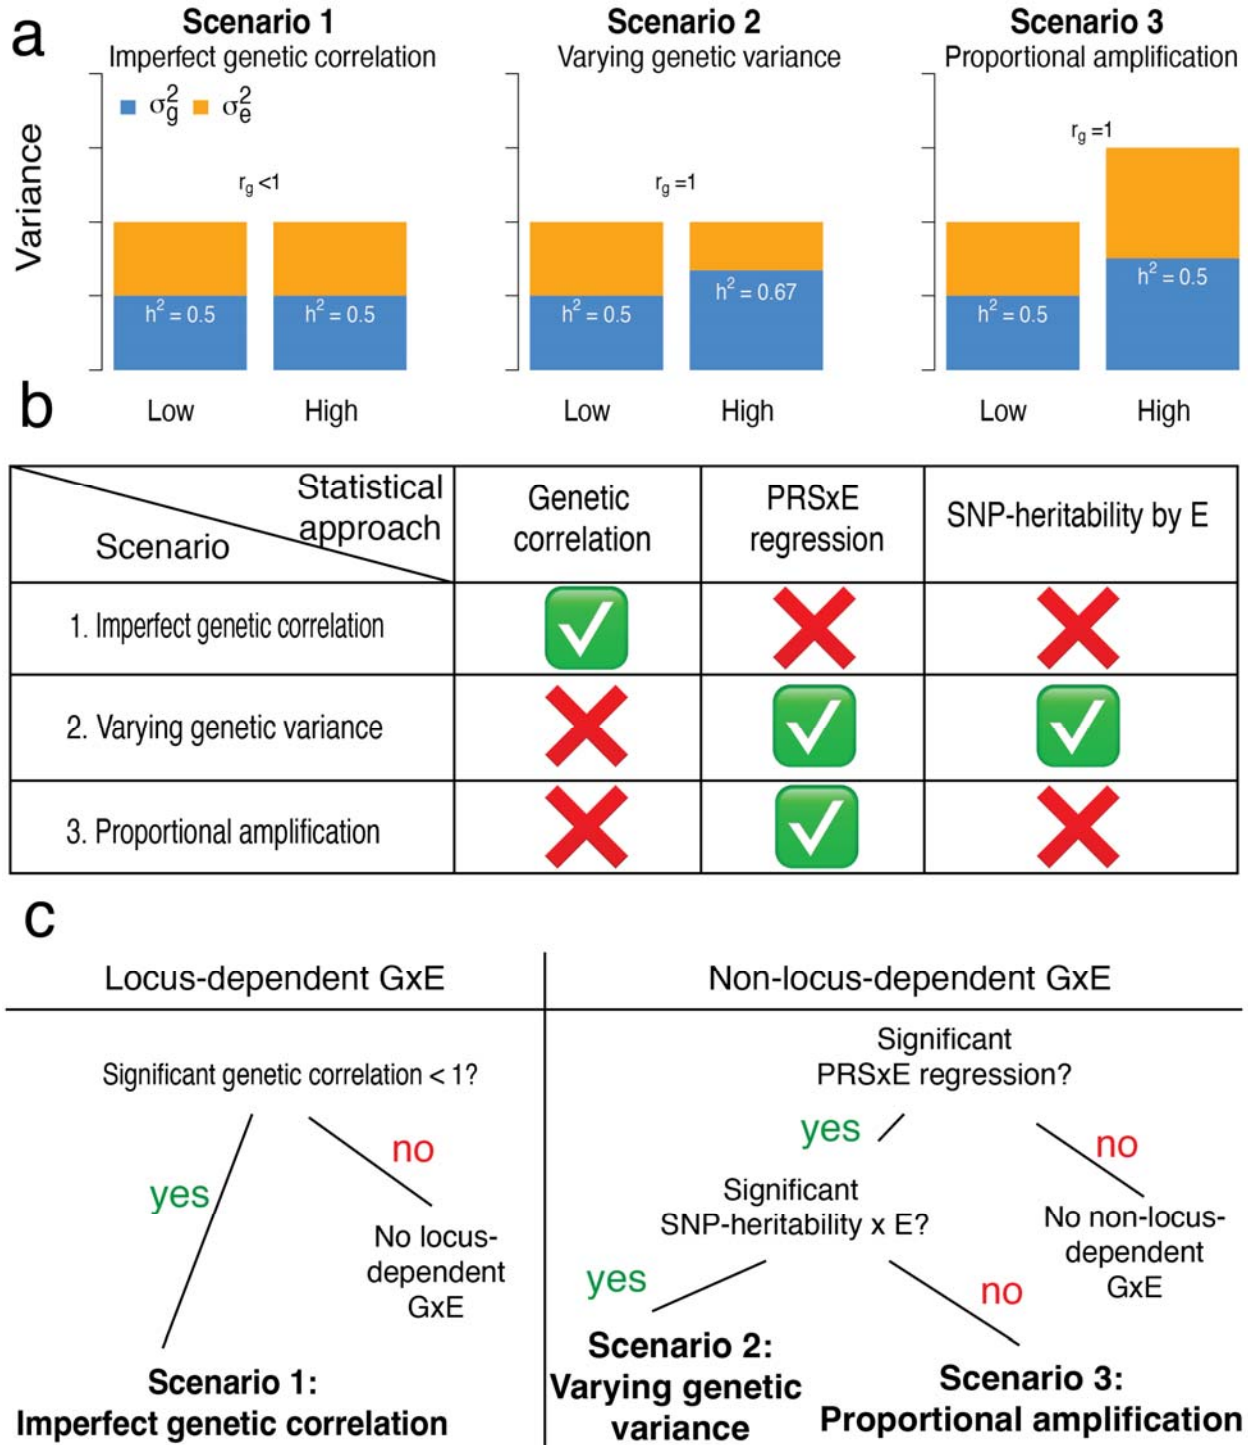

659  
660  
661  
662  
663

**Figure 1. Overview of 3 GxE Scenarios and statistical approaches to detect and distinguish between them.** (a) Relative values of genetic (blue) and environmental (orange) variance in each Scenario. (b) Statistical approaches to detect and distinguish between each Scenario. (c) Flow chart for classifying results into Scenarios.



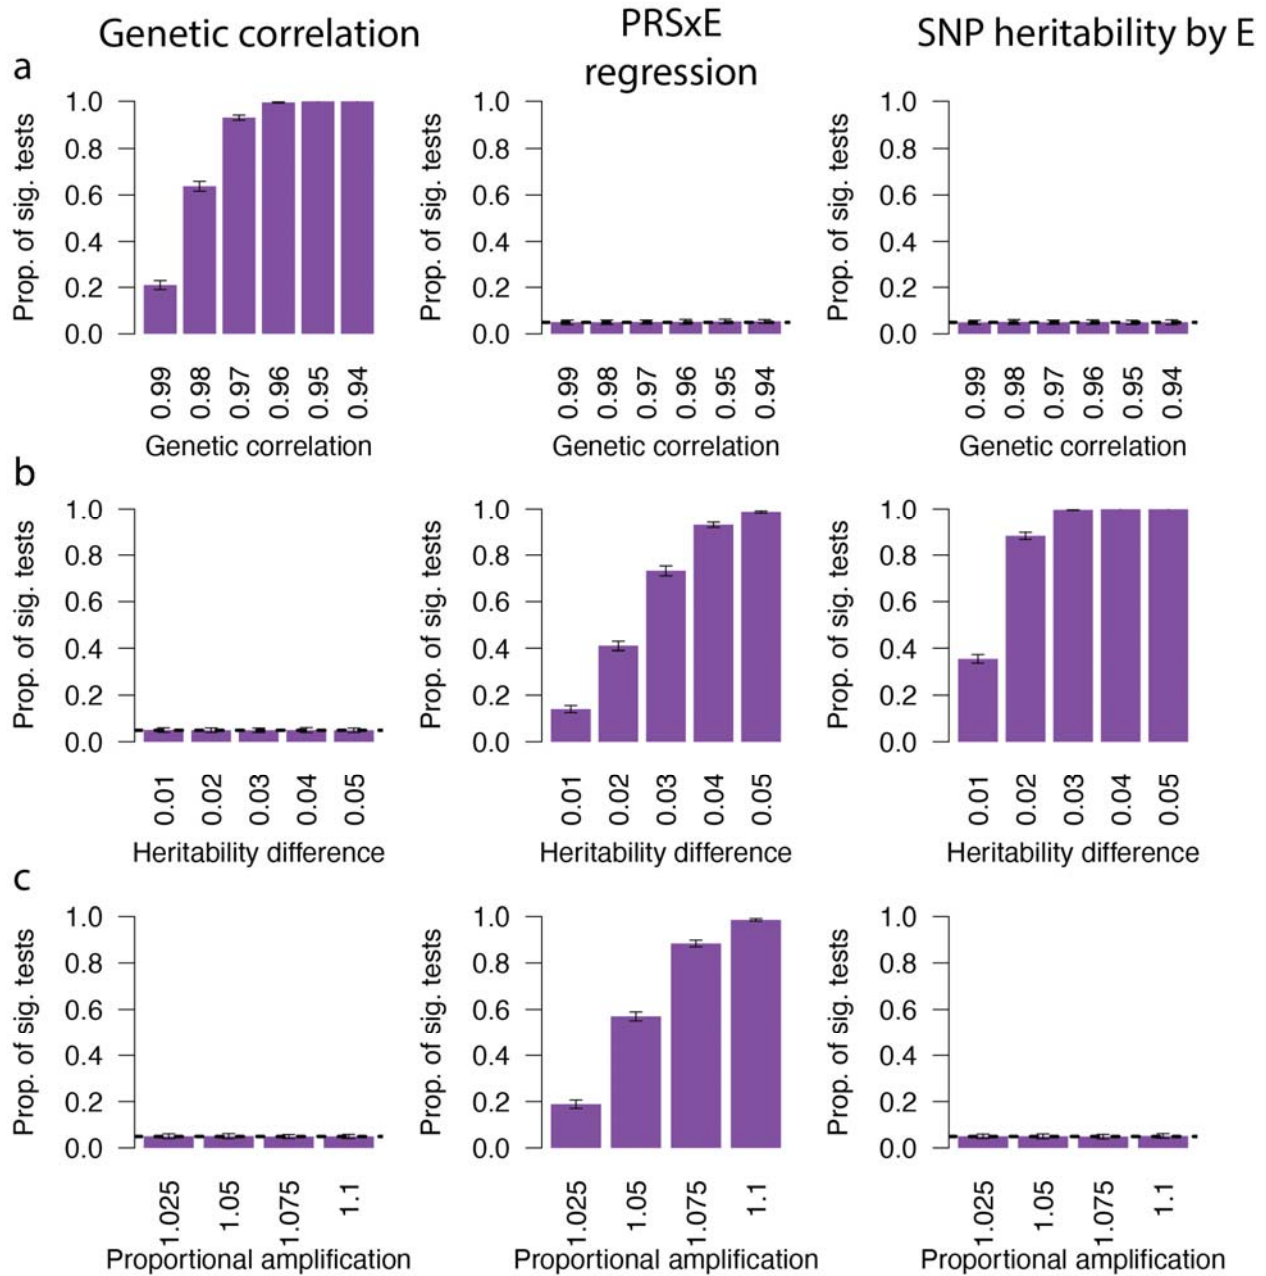

664  
665  
666  
667  
668  
669  
670  
671

**Figure 2. Detecting and distinguishing between 3 Scenarios of GxE interaction in simulations.** Rows denote 3 Scenarios (1-3), and columns denote 3 statistical approaches. (a) Proportion of significant tests for Scenario 1 (Imperfect genetic correlation) across 3 statistical approaches. (b) Proportion of significant tests for Scenario 2 (varying genetic variance) across 3 statistical approaches. (c) Proportion of significant tests for Scenario 3 (proportional amplification) across 3 statistical approaches. Error bars denote standard deviations across 100 simulation replicates. Numerical results are reported in **Supplementary Table 1**.

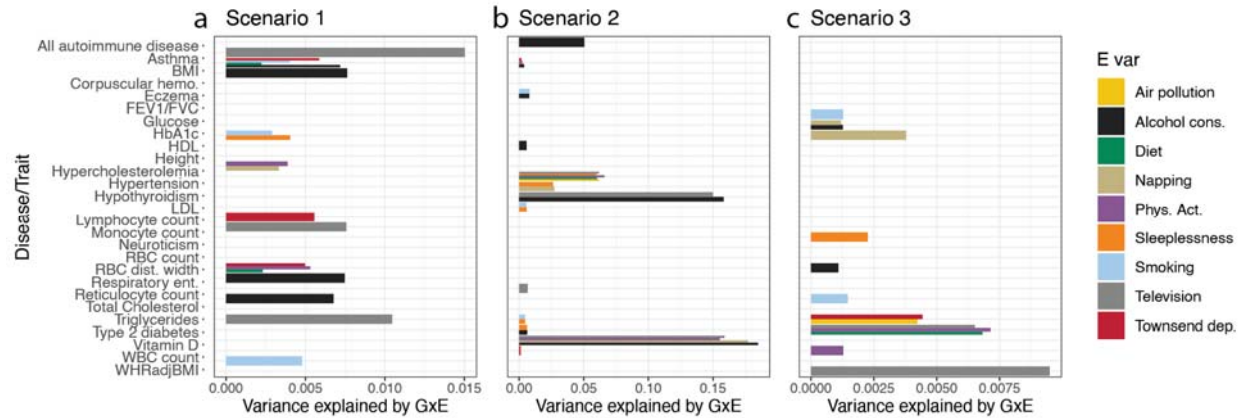

672  
 673 **Figure 3. Detecting, quantifying, and distinguishing between 3 Scenarios of GxE**  
 674 **interaction across 33 diseases/traits and 10 E variables.** Diseases/traits are reported on the y-  
 675 axis and estimates of excess variance explained by GxE are reported on the x-axis. Only  
 676 significant results are reported (FDR < 5% across traits and E variables, computed separately for  
 677 each Scenario). For diseases/traits with multiple significant E variables in a given Scenario,  
 678 results for each significant E variable are reported separately using bars with smaller thickness.  
 679 (a) Results for trait-E pairs in Scenario 1: Imperfect genetic correlation. (b) Results for trait-E  
 680 pairs in Scenario 2: Varying genetic variance; we note that BMI has significant GxE for  
 681 Townsend deprivation (red), physical activity (purple), and alcohol consumption (black). (c)  
 682 Results for trait-E pairs in Scenario 3: Proportional amplification. Numerical results are reported  
 683 in **Supplementary Table S5**.

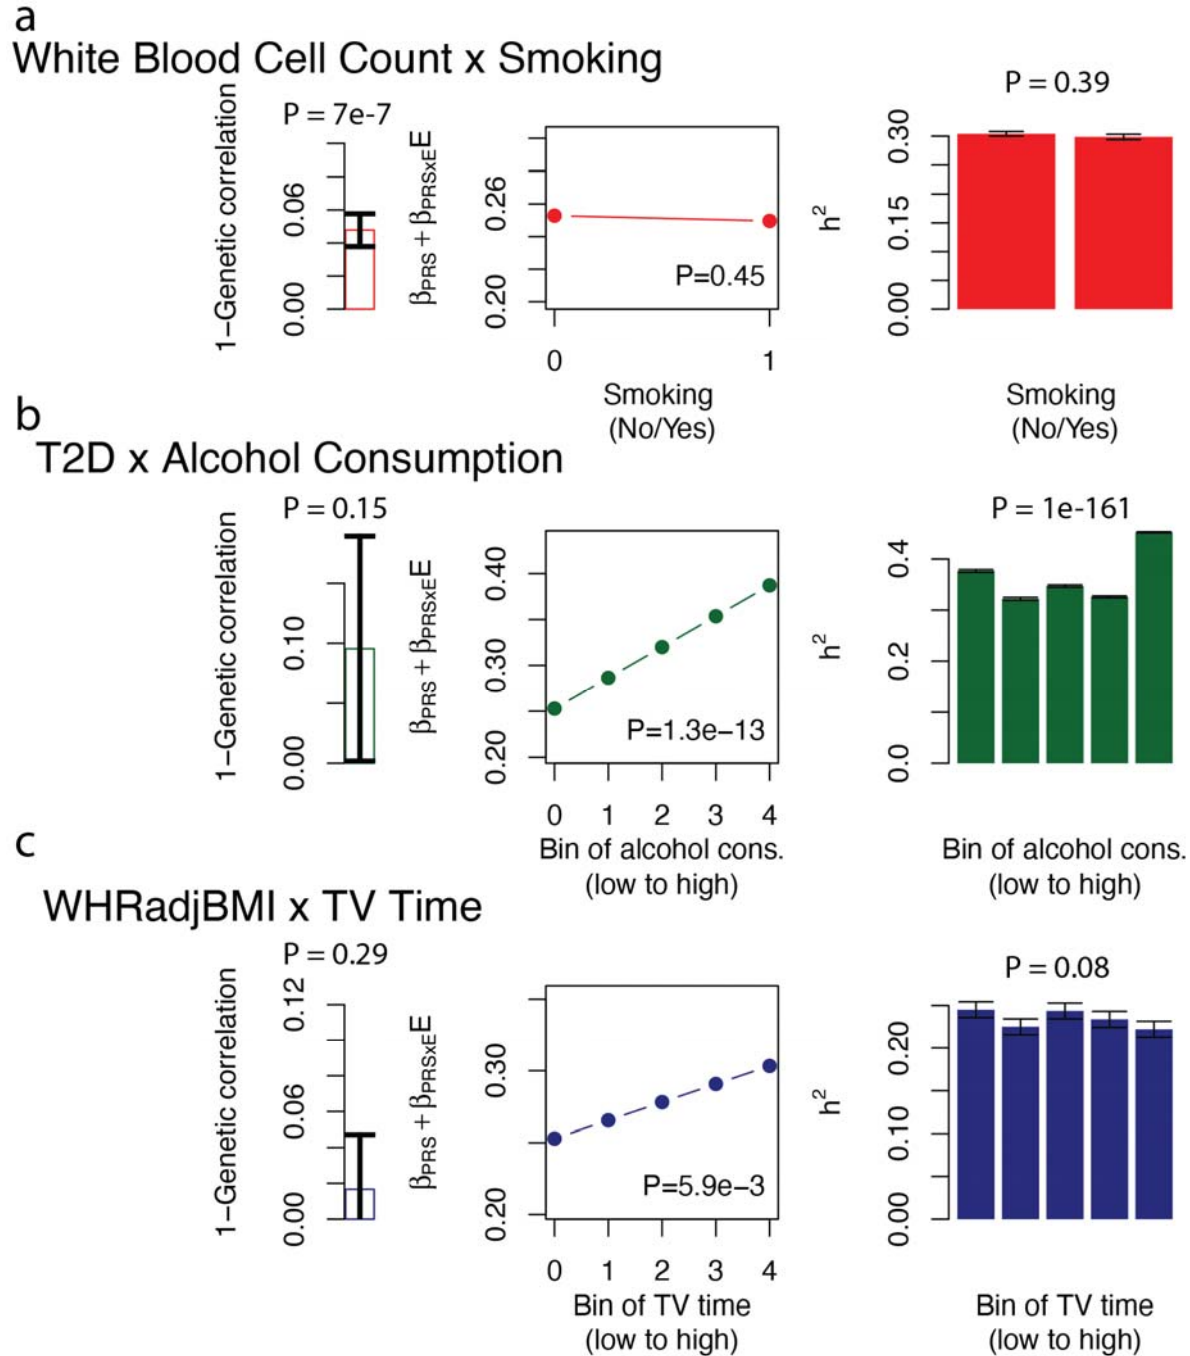

684  
685 **Figure 4. Examples of 3 Scenarios of GxE interaction.** (a) White blood cell count x smoking  
686 status is consistent with Scenario 1: Imperfect genetic correlation. (b) Type 2 diabetes x alcohol  
687 consumption is consistent with Scenario 2: Varying genetic variance. (c) Waist-to-hip ratio  
688 adjusted for BMI x Time spent watching TV is consistent with Scenario 3: Proportional  
689 amplification. Numerical results are reported in **Supplementary Table S8**.

690  
691  
692

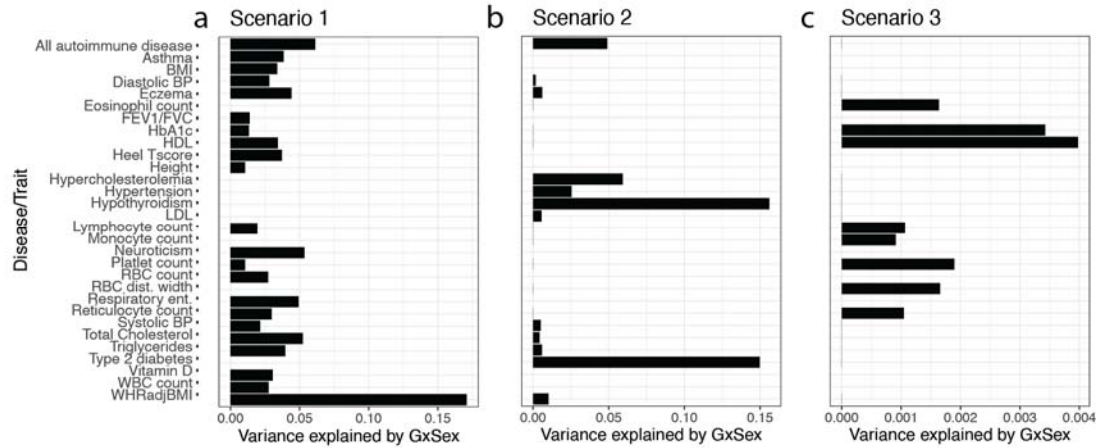

693  
694 **Figure 5. Detecting, quantifying, and distinguishing between 3 Scenarios of GxSex**  
695 **interaction across 33 diseases/traits.** Diseases/traits are reported on the y-axis and estimates of  
696 excess variance explained by GxSex are reported on the x-axis. Only significant results are  
697 reported (FDR < 5% across traits, computed separately for each Scenario). (a) Results for traits  
698 in Scenario 1: Imperfect genetic correlation. (b) Results for traits in Scenario 2: Varying genetic  
699 variance. (c) Results for traits in Scenario 3: Proportional amplification. Numerical results are  
700 reported in **Supplementary Table S9**.

701  
702

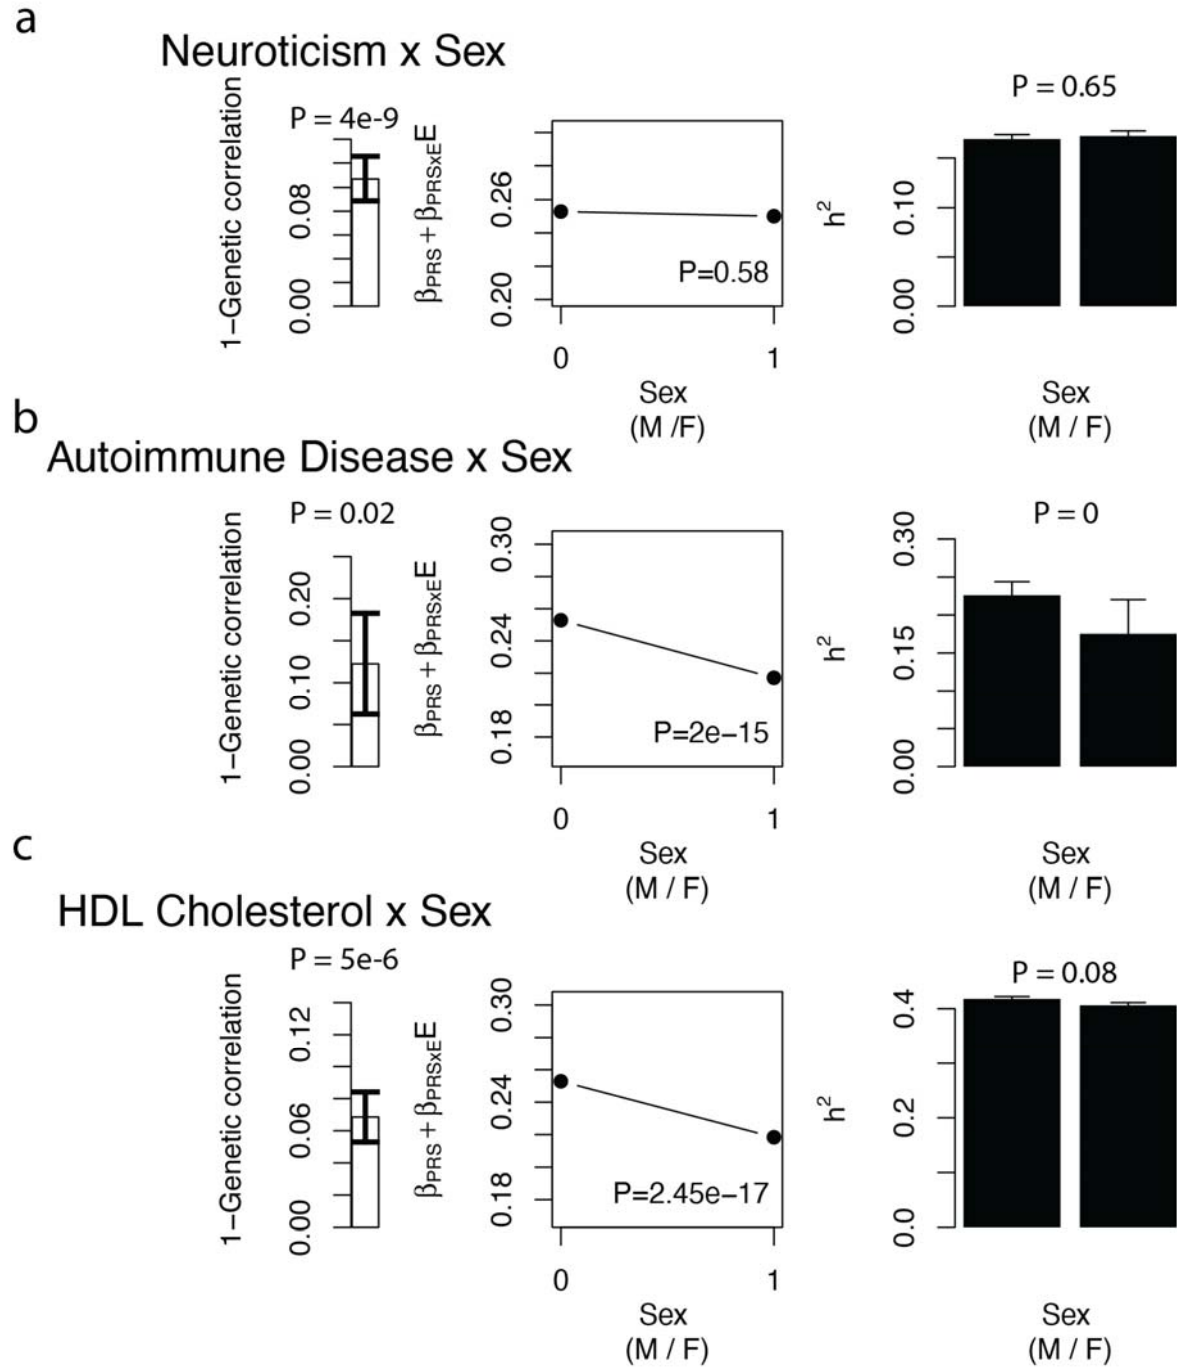

703  
704 **Figure 6. Examples of 3 Scenarios of GxSex interaction.** (a) Neuroticism x Sex is consistent  
705 with Scenario 1: Imperfect genetic correlation. (b) All autoimmune disease x Sex is consistent  
706 with Scenario 2: Varying genetic variance. (c) HDL Cholesterol x Sex is consistent with  
707 Scenario 1 and Scenario 3. Numerical results are reported in **Supplementary Table S11**.  
708

709 **References**

- 710 1. Hunter, D. J. Gene–environment interactions in human diseases. *Nat. Rev. Genet.* **6**, 287–298  
711 (2005).
- 712 2. Thomas, D. Gene-Environment-Wide Association Studies: Emerging Approaches. *Nat. Rev.*  
713 *Genet.* **11**, 259–272 (2010).
- 714 3. Franks, P. W. & McCarthy, M. I. Exposing the exposures responsible for type 2 diabetes and  
715 obesity. *Science* **354**, 69–73 (2016).
- 716 4. Li, J., Li, X., Zhang, S. & Snyder, M. Gene-Environment Interaction in the Era of Precision  
717 Medicine. *Cell* **177**, 38–44 (2019).
- 718 5. Hu, Z. *et al.* A genome-wide association study identifies two new lung cancer susceptibility  
719 loci at 13q12.12 and 22q12.2 in Han Chinese. *Nat. Genet.* **43**, 792–796 (2011).
- 720 6. Wu, C. *et al.* Genome-wide association analyses of esophageal squamous cell carcinoma in  
721 Chinese identify multiple susceptibility loci and gene-environment interactions. *Nat. Genet.*  
722 **44**, 1090–1097 (2012).
- 723 7. Young, A. I., Wauthier, F. & Donnelly, P. Multiple novel gene-by-environment interactions  
724 modify the effect of FTO variants on body mass index. *Nat. Commun.* **7**, 12724 (2016).
- 725 8. Yang, J. *et al.* FTO genotype is associated with phenotypic variability of body mass index.  
726 *Nature* **490**, 267–272 (2012).
- 727 9. Shungin, D. *et al.* Ranking and characterization of established BMI and lipid associated loci as  
728 candidates for gene-environment interactions. *PLOS Genet.* **13**, e1006812 (2017).
- 729 10. Young, A. I., Wauthier, F. L. & Donnelly, P. Identifying loci affecting trait variability  
730 and detecting interactions in genome-wide association studies. *Nat. Genet.* **50**, 1608–1614  
731 (2018).

- 732 11. Wang, H. *et al.* Genotype-by-environment interactions inferred from genetic effects on  
733 phenotypic variability in the UK Biobank. *Sci. Adv.* **5**, eaaw3538 (2019).
- 734 12. Westerman, K. E. *et al.* Variance-quantitative trait loci enable systematic discovery of  
735 gene-environment interactions for cardiometabolic serum biomarkers. *Nat. Commun.* **13**, 3993  
736 (2022).
- 737 13. Yang, J., Lee, S. H., Goddard, M. E. & Visscher, P. M. GCTA: a tool for genome-wide  
738 complex trait analysis. *Am. J. Hum. Genet.* **88**, 76–82 (2011).
- 739 14. Robinson, M. R. *et al.* Genotype–covariate interaction effects and the heritability of adult  
740 body mass index. *Nat. Genet.* **49**, 1174–1181 (2017).
- 741 15. Moore, R. *et al.* A linear mixed-model approach to study multivariate gene–environment  
742 interactions. *Nat. Genet.* **51**, 180–186 (2019).
- 743 16. Dahl, A. *et al.* A Robust Method Uncovers Significant Context-Specific Heritability in  
744 Diverse Complex Traits. *Am. J. Hum. Genet.* **106**, 71–91 (2020).
- 745 17. Kerin, M. & Marchini, J. Inferring Gene-by-Environment Interactions with a Bayesian  
746 Whole-Genome Regression Model. *Am. J. Hum. Genet.* **107**, 698–713 (2020).
- 747 18. Di Scipio, M. *et al.* A versatile, fast and unbiased method for estimation of gene-by-  
748 environment interaction effects on biobank-scale datasets. *Nat. Commun.* **14**, 5196 (2023).
- 749 19. Traglia, M. *et al.* Genetic Mechanisms Leading to Sex Differences Across Common  
750 Diseases and Anthropometric Traits. *Genetics* **205**, 979–992 (2017).
- 751 20. Khramtsova, E. A., Davis, L. K. & Stranger, B. E. The role of sex in the genomics  
752 of human complex traits. *Nat. Rev. Genet.* **20**, 173–190 (2019).
- 753 21. Kamitaki, N. *et al.* Complement genes contribute sex-biased vulnerability in diverse  
754 disorders. *Nature* **582**, 577–581 (2020).

- 755 22. Bernabeu, E. *et al.* Sex differences in genetic architecture in the UK Biobank. *Nat. Genet.*  
756 **53**, 1283–1289 (2021).
- 757 23. Khramtsova, E. A. *et al.* Quality control and analytic best practices for testing genetic  
758 models of sex differences in large populations. *Cell* **186**, 2044–2061 (2023).
- 759 24. Zhu, C. *et al.* Amplification is the primary mode of gene-by-sex interaction in complex  
760 human traits. *Cell Genomics* **3**, (2023).
- 761 25. Bulik-Sullivan, B. *et al.* An atlas of genetic correlations across human diseases and traits.  
762 *Nat. Genet.* **47**, 1236–1241 (2015).
- 763 26. Loh, P.-R., Kichaev, G., Gazal, S., Schoech, A. P. & Price, A. L. Mixed-model  
764 association for biobank-scale datasets. *Nat. Genet.* **50**, 906–908 (2018).
- 765 27. Weissbrod, O. *et al.* Leveraging fine-mapping and multipopulation training data to  
766 improve cross-population polygenic risk scores. *Nat. Genet.* **54**, 450–458 (2022).
- 767 28. Rask-Andersen, M., Karlsson, T., Ek, W. E. & Johansson, Å. Gene-environment  
768 interaction study for BMI reveals interactions between genetic factors and physical activity,  
769 alcohol consumption and socioeconomic status. *PLoS Genet.* **13**, e1006977 (2017).
- 770 29. Marderstein, A. R. *et al.* Leveraging phenotypic variability to identify genetic  
771 interactions in human phenotypes. *Am. J. Hum. Genet.* **108**, 49–67 (2021).
- 772 30. Yang, J. *et al.* Common SNPs explain a large proportion of the heritability for human  
773 height. *Nat. Genet.* **42**, 565–569 (2010).
- 774 31. Lee, S. H., Wray, N. R., Goddard, M. E. & Visscher, P. M. Estimating missing  
775 heritability for disease from genome-wide association studies. *Am. J. Hum. Genet.* **88**, 294–  
776 305 (2011).



- 777 32. Lee, S. H. *et al.* Estimating the proportion of variation in susceptibility to schizophrenia  
778 captured by common SNPs. *Nat. Genet.* **44**, 247–250 (2012).
- 779 33. Loh, P.-R. *et al.* Contrasting genetic architectures of schizophrenia and other complex  
780 diseases using fast variance-components analysis. *Nat. Genet.* **47**, 1385–1392 (2015).
- 781 34. Pazokitoroudi, A. *et al.* Efficient variance components analysis across millions of  
782 genomes. *Nat. Commun.* **11**, 4020 (2020).
- 783 35. Bycroft, C. *et al.* The UK Biobank resource with deep phenotyping and genomic data.  
784 *Nature* **562**, 203 (2018).
- 785 36. Bulik-Sullivan, B. K. *et al.* LD Score regression distinguishes confounding from  
786 polygenicity in genome-wide association studies. *Nat. Genet.* **47**, 291–295 (2015).
- 787 37. Voorman, A., Lumley, T., McKnight, B. & Rice, K. Behavior of QQ-Plots and Genomic  
788 Control in Studies of Gene-Environment Interaction. *PLOS ONE* **6**, e19416 (2011).
- 789 38. Huber, P. J. The behavior of maximum likelihood estimates under nonstandard  
790 conditions. in *Proceedings of the Fifth Berkeley Symposium on Mathematical Statistics and*  
791 *Probability, Volume 1: Statistics* vol. 5.1 221–234 (University of California Press, 1967).
- 792 39. White, H. A Heteroskedasticity-Consistent Covariance Matrix Estimator and a Direct  
793 Test for Heteroskedasticity. *Econometrica* **48**, 817–838 (1980).
- 794 40. Pedersen, K. M. *et al.* Smoking and Increased White and Red Blood Cells. *Arterioscler.*  
795 *Thromb. Vasc. Biol.* **39**, 965–977 (2019).
- 796 41. Baliunas, D. O. *et al.* Alcohol as a Risk Factor for Type 2 Diabetes. *Diabetes Care* **32**,  
797 2123–2132 (2009).
- 798 42. Wendt, F. R. *et al.* Sex-Specific Genetic and Transcriptomic Liability to Neuroticism.  
799 *Biol. Psychiatry* **93**, 243–252 (2023).

- 800 43. Whitacre, C. C. Sex differences in autoimmune disease. *Nat. Immunol.* **2**, 777–780  
801 (2001).
- 802 44. Mostafavi, H. *et al.* Variable prediction accuracy of polygenic scores within an ancestry  
803 group. *eLife* **9**, e48376 (2020).
- 804 45. Shi, H. *et al.* Population-specific causal disease effect sizes in functionally important  
805 regions impacted by selection. *Nat. Commun.* **12**, 1098 (2021).
- 806 46. Visscher, P. M., Hill, W. G. & Wray, N. R. Heritability in the genomics era--concepts  
807 and misconceptions. *Nat. Rev. Genet.* **9**, 255–266 (2008).
- 808 47. Polderman, T. J. C. *et al.* Meta-analysis of the heritability of human traits based on fifty  
809 years of twin studies. *Nat. Genet.* **47**, 702–709 (2015).
- 810 48. Zuk, O., Hechter, E., Sunyaev, S. R. & Lander, E. S. The mystery of missing heritability:  
811 Genetic interactions create phantom heritability. *Proc. Natl. Acad. Sci. U. S. A.* **109**, 1193–  
812 1198 (2012).
- 813 49. Cordell, H. J. Detecting gene-gene interactions that underlie human diseases. *Nat. Rev.*  
814 *Genet.* **10**, 392–404 (2009).
- 815 50. Zaitlen, N. *et al.* Informed Conditioning on Clinical Covariates Increases Power in Case-  
816 Control Association Studies. *PLOS Genet.* **8**, e1003032 (2012).
- 817 51. Jiang, X., Holmes, C. & McVean, G. The impact of age on genetic risk for common  
818 diseases. *PLOS Genet.* **17**, e1009723 (2021).
- 819 52. Kanai, M. *et al.* Genetic analysis of quantitative traits in the Japanese population links  
820 cell types to complex human diseases. *Nat. Genet.* **50**, 390–400 (2018).
- 821 53. All of Us Research Program Investigators *et al.* The ‘All of Us’ Research Program. *N.*  
822 *Engl. J. Med.* **381**, 668–676 (2019).

- 823 54. Martin, A. R. *et al.* Clinical use of current polygenic risk scores may exacerbate health  
824 disparities. *Nat. Genet.* **51**, 584 (2019).
- 825 55. Dey, R. *et al.* Efficient and accurate frailty model approach for genome-wide survival  
826 association analysis in large-scale biobanks. *Nat. Commun.* **13**, 5437 (2022).
- 827 56. Pedersen, E. M. *et al.* ADuLT: An efficient and robust time-to-event GWAS. *Nat.*  
828 *Commun.* **14**, 5553 (2023).
- 829 57. Chang, C. C. *et al.* Second-generation PLINK: rising to the challenge of larger and richer  
830 datasets. *GigaScience* **4**, s13742-015-0047-8 (2015).
- 831 58. qvalue: Q-value estimation for false discovery rate control. (2023).
- 832 59. Benjamini, Y. & Hochberg, Y. Controlling the False Discovery Rate: A Practical and  
833 Powerful Approach to Multiple Testing. *J. R. Stat. Soc. Ser. B Methodol.* **57**, 289–300 (1995).
- 834 60. Storey, J. D. & Tibshirani, R. Statistical significance for genomewide studies. *Proc. Natl.*  
835 *Acad. Sci. U. S. A.* **100**, 9440–9445 (2003).
- 836 61. Mbatchou, J. *et al.* Computationally efficient whole-genome regression for quantitative  
837 and binary traits. *Nat. Genet.* **53**, 1097–1103 (2021).
- 838 62. Jiang, L. *et al.* A resource-efficient tool for mixed model association analysis of large-  
839 scale data. *Nat. Genet.* **51**, 1749–1755 (2019).
- 840 63. Ge, T., Chen, C.-Y., Ni, Y., Feng, Y.-C. A. & Smoller, J. W. Polygenic prediction via  
841 Bayesian regression and continuous shrinkage priors. *Nat. Commun.* **10**, 1776 (2019).
- 842 64. Lloyd-Jones, L. R. *et al.* Improved polygenic prediction by Bayesian multiple regression  
843 on summary statistics. *Nat. Commun.* **10**, 5086 (2019).
- 844 65. Privé, F., Arbel, J. & Vilhjálmsson, B. J. LDpred2: better, faster, stronger. *Bioinformatics*  
845 **36**, 5424–5431 (2021).

846 66. Vilhjálmsón, B. J. *et al.* Modeling Linkage Disequilibrium Increases Accuracy of  
847 Polygenic Risk Scores. *Am. J. Hum. Genet.* **97**, 576–592 (2015).

848

849

850  
851  
852

**Supplementary Material**

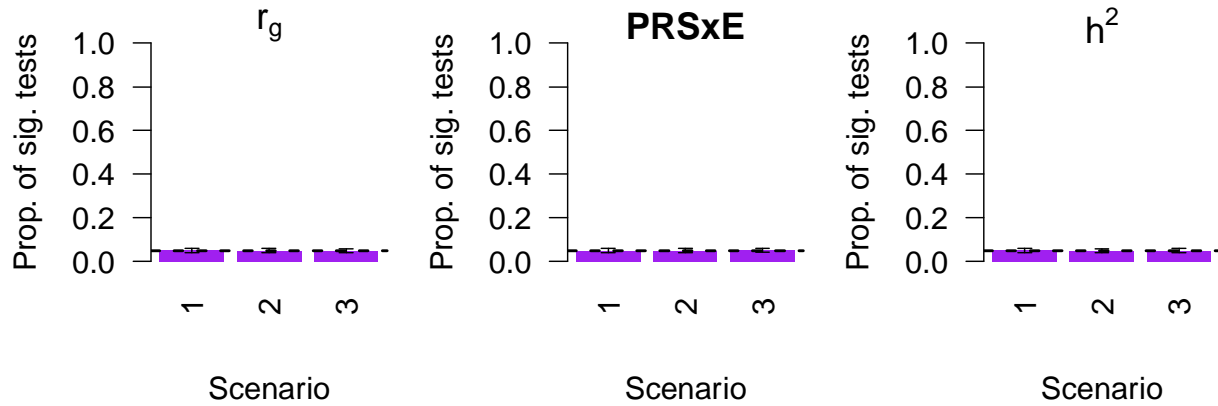

853  
854  
855  
856  
857  
858  
859  
860

**Figure S1 Results of 3 statistical approaches for detecting GxE in null simulations with no GxE.** (a) Proportion of significant tests for genetic correlation across 3 scenarios. (b) Proportion of significant tests for PRSxE regression across 3 scenarios. (c) Proportion of significant tests for SNP-heritability by E across 3 scenarios. Error bars denote standard deviations across 100 simulation replicates.

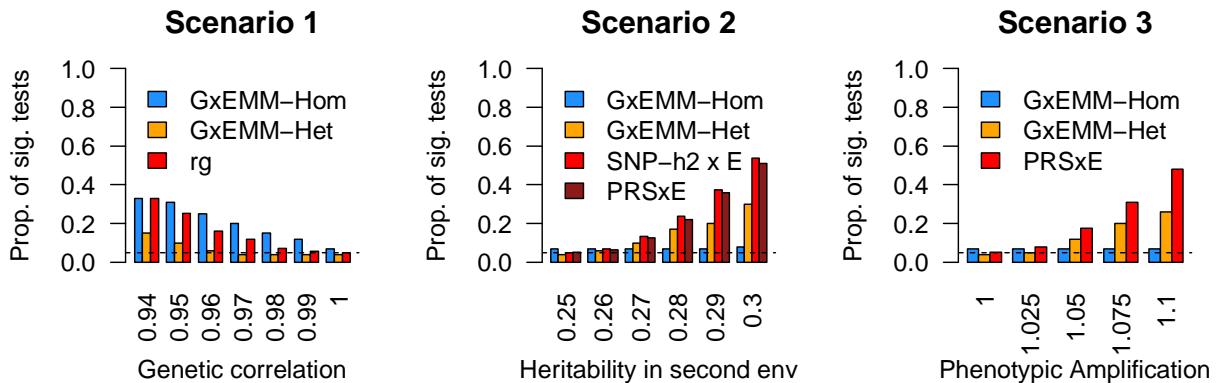

861  
862  
863  
864  
865  
866

**Figure S2 Comparison of three statistical approaches for detecting GxE to ExEMM in simulations.** a) Scenario 1 with varying true genetic correlation across E, b) Scenario 2 with varying heritability in the second environment, c) Scenario 3 with phenotypic amplification across E bins.

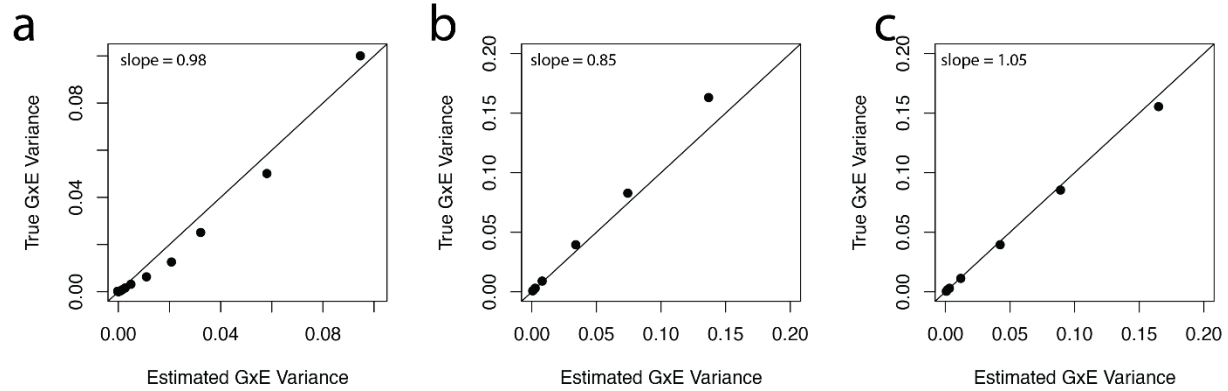

867  
868  
869  
870  
871  
872

**Figure S3 Accuracy of estimates of excess trait variance explained by GxE interaction in simulations.** a) genetic correlation in Scenario 1, b) PRS<sub>x</sub>E in Scenario 2, and c) PRS<sub>x</sub>E in Scenario 3. For all plots, the black line corresponds to the  $y=x$  line and the x and y axes are both on a log scale.

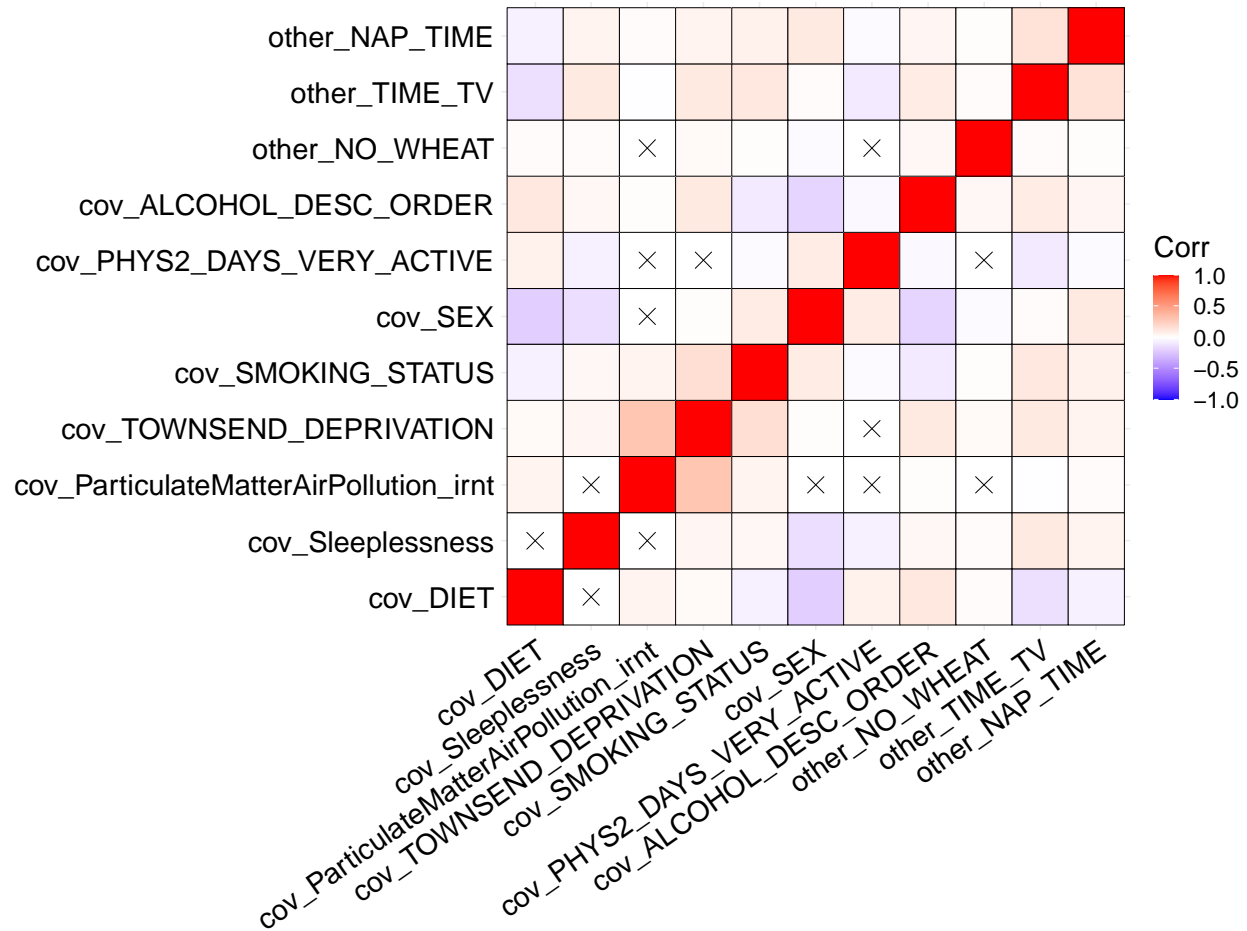

873  
 874 **Figure S4 Phenotypic correlations between E variables.** X denotes non-significant  
 875 comparisons at a p-value threshold of 0.05/11.

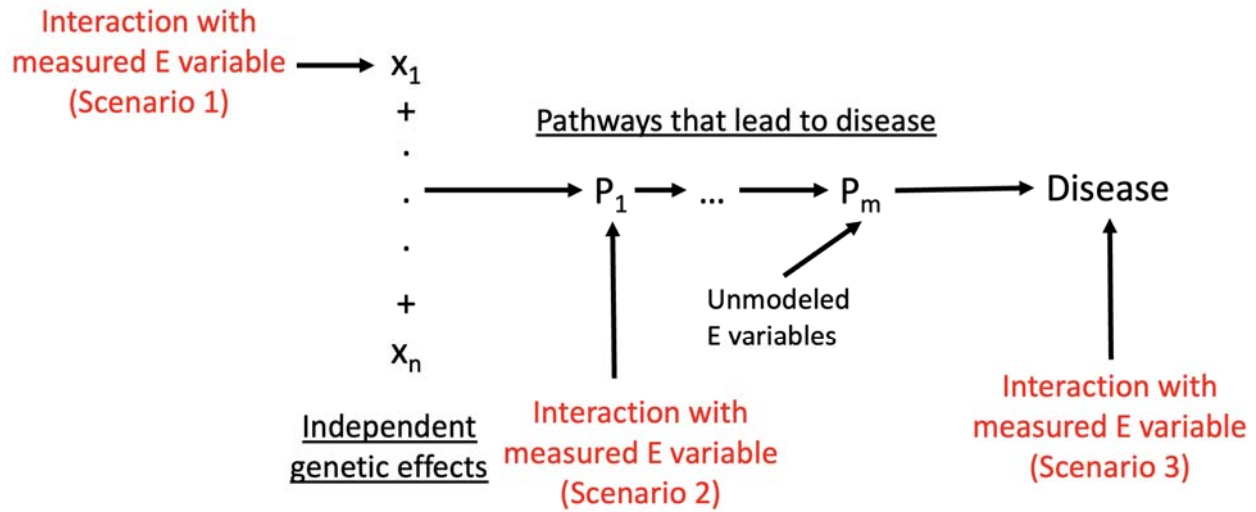

876  
877  
878  
879  
880  
881  
882

**Figure S5 Conceptual model linking three scenarios of GxE.** Scenario 1 can be conceptualized as E variables modifying the effects of independent loci. Scenario 2 can be conceptualized as modifying pathways which aggregate the genetic effects of many loci, resulting in a scaling of genetic effects. Finally, Scenario 3 can be conceptualized as modifying the total genetic liability.



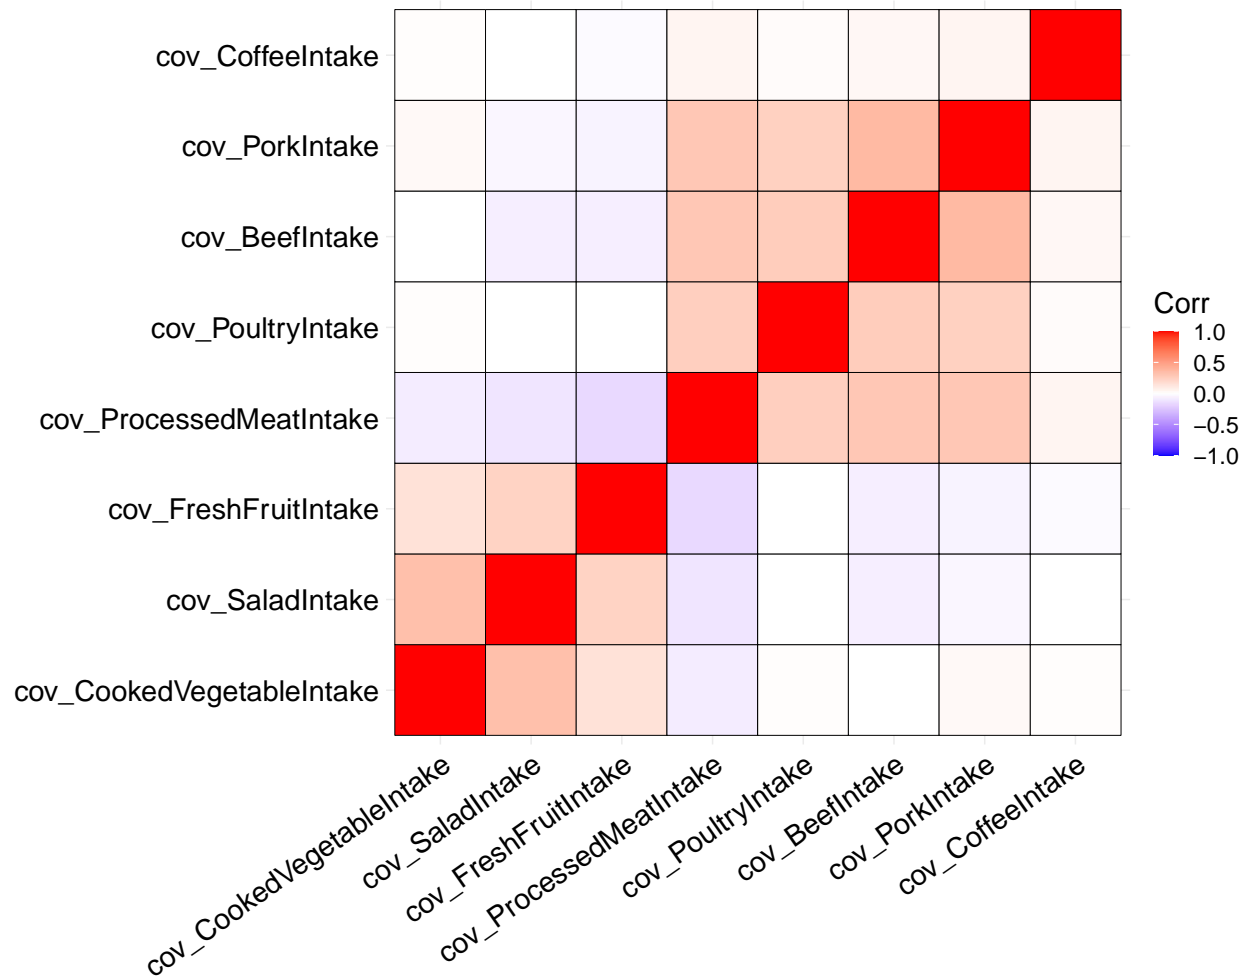

883  
884 **Figure S6 Phenotypic correlations of diet variables used to construct a composite Diet**  
885 **variable.** Each cell in the heatmap shows the correlation between the measured diet variable on  
886 the X axis and the measured diet variable on the Y axis. All correlations are significant at a  
887 Bonferroni corrected p-value threshold of 0.05.

888  
889 **Supplementary Table 1 Numerical results of Detecting and distinguishing between 3**  
890 **Scenarios of GxE interaction in simulations.** For each statistical approach and scenario, we  
891 report the proportion of significant tests and standard deviation across replicates.

892  
893 **Supplementary Table 2 Simulations showing bias induced by correlated G and GxE effects.**  
894 We tested the impact of correlated G and GxE effects on variance component estimates when  
895 assuming that G and GxE effects are not correlated. We set the true variance of G effects to 0.1  
896 and the true variance of GxE effects to 0.1. We varied the correlation of the G and GxE effects

897 and simulated values for 100,000 individuals. We estimate the variance explained by G and GxE  
898 using ANOVA in R and report the bias (estimated effect - true effect).

899

900 **Supplementary Table 3 Description of the 33 UK Biobank traits analyzed.** For each trait we  
901 report a detailed name, the GWAS sample size (including number of cases for binary traits), the  
902 SNP-heritability (liability scale for binary traits), and the PRS accuracy ( $R^2$ ; observed scale for  
903 binary traits).

904

905 **Supplementary Table 4 SNP-heritability of E variables studied here.** We estimated SNP-  
906 heritability using LDSC. For the composite diet variable, we report the SNP-heritability for each  
907 of the underlying variables that make up the composite diet variable. P-values test against a null  
908 of zero SNP-heritability.

909

910 **Supplementary Table 5 Numerical results of Detecting, quantifying, and distinguishing**  
911 **between 3 Scenarios of GxE interaction across 33 diseases/traits and 10 E variables.** For  
912 each trait-E pair (A, B), we report (C) the excess variance explained by PRSxE and (D) the  
913 associated q value, (E) the difference in heritability between the top and bottom bins of the E  
914 variables and (F) the associated q value, (G) the genetic correlation between the top and bottom  
915 bin of the E variable and (H) the associated q value. We also assign each trait-E pair to the three  
916 scenarios (I, J, K).

917

918 **Supplementary Table 6 P-values using robust regression in PRSxE regression analysis**  
919 **compared to P-value from the main PRSxE regression analysis.** For each trait-E pair, we  
920 report (A) p-value and (B) effect size for the main PRSxE regression and (C, D) using the Huber-  
921 White variance estimator (robust regression).

922

923 **Supplementary Table 7 SNP-heritability differences for trait-E pairs with no PRSxE**  
924 **interaction.** For each trait-E pair with a significant difference in SNP-heritability and no  
925 significant PRSxE interaction we report the SNP-heritability difference and q-value at 5% FDR  
926 control.

927

928 **Supplementary Table 8 Numerical results of Examples of 3 Scenarios of GxE interaction.**  
929 We report detailed results for 3 trait-E pairs reported in Figure 4. For each trait-E pair (A, B), we  
930 report (C) the genetic correlation and (D) p-value, (E) PRSxE regression coefficient and (F) p-  
931 value, (G, H, I, J, K) SNP-heritability across bins of the E variable with associated standard error  
932 and (L) the p-value testing for a difference between the top and bottom bins of the E variable.

933

934 **Supplementary Table 9 Numerical results of Detecting, quantifying, and distinguishing**  
935 **between 3 Scenarios of GxSex interaction across 33 diseases/traits.** For each trait (A, B), we  
936 report (C) the excess variance explained by PRSxSex and (D) the associated q value, (E) the  
937 difference in heritability between males and females and (F) the associated q value, (G) the  
938 genetic correlation between males and females and (H) the associated q value. We also assign  
939 each trait-E pair to the three scenarios (I, J, K).

940

941 **Supplementary Table 10 SNP-heritability differences for trait-sex pairs with no PRSxSex**  
942 **interaction.** For each trait-sex pair with a significant difference in SNP-heritability and no

943 significant PRSxSex interaction we report the SNP-heritability difference and q-value at 5%  
944 FDR control.

945  
946 **Supplementary Table 11 Numerical results of Examples of 3 Scenarios of GxSex**  
947 **interaction.** We report detailed results for 3 trait-sex pairs reported in Figure 4. For each trait (A,  
948 B), we report (C) the genetic correlation and (D) p-value, (E) PRSxE regression coefficient and  
949 (F) p-value, (G, H, I, J, K) SNP-heritability across sex with associated standard error and (L) the  
950 p-value testing for a difference between the top and bottom bins of the E variable.

951  
952 **Supplementary Table 12 Average variance explained by binary and quantitative traits.** For  
953 each scenario, we report the average trait variance explained by binary, quantitative, and all traits  
954 for both GxE and GxSex interactions.

955  
956 **Supplementary Table 13 PRSxE regression results including a non-linear E term.** For each  
957 trait-E pair, we report (A) P-value and (B) effect size including  $E^2$  as a covariate and (C, D) not  
958 including  $E^2$  as a covariate.

959  
960 **Supplementary Table 14 Trait variance explained by GxE interactions with multiple E**  
961 **variables.** For traits with multiple marginally significant E variable interactions, we report the  
962 variance explained by a joint model with all marginally significant E variables.

963  
964 **Supplementary Note for “Distinct explanations underlie gene-environment interactions in**  
965 **the UK Biobank”**
